# Supplementary material for: Energetics competition in centrally four-coordinated water clusters and Raman spectroscopic signature for hydrogen bonding
Source: Royal Society of Chemistry journal article supplement (doi:10.1039/c6ra28335g), 2017-01-01
Supplement: c6ra28335g1.pdf [file c6ra28335g1.pdf]

## Supplementary Information

### **Energetics competition in centrally four-coordinated water clusters and Raman spectroscopic signature for hydrogen bonding**

Bo Wang,<sup>†ab</sup> Wanrun Jiang,<sup>†ab</sup> Yang Gao,<sup>ab</sup> Zhiyuan Zhang,<sup>ab</sup> Changqing Sun,<sup>c</sup> Fang Liu<sup>\*ab</sup> and Zhigang Wang<sup>\*ab</sup>

<sup>1</sup>*Institute of Atomic and Molecular Physics, Jilin University, Changchun 130012, China*

<sup>2</sup>*Jilin Provincial Key Laboratory of Applied Atomic and Molecular Spectroscopy (Jilin University), Changchun 130012, China*

<sup>3</sup>*School of Electrical and Electronic Engineering, Nanyang Technological University, Singapore 639798, Singapore.*

<sup>†</sup>These authors contributed equally to this work.

Correspondence to: fliu110@163.com (F. L.) or wangzg@jlu.edu.cn (Z. W.)

#### **Contents:**

**Part 1. The Cartesian coordinates of the optimized structures of different clusters.**

**Part 2. Interaction energy details.**

**Part 3. The mass-weighted atomic displacements of these O-H stretching modes.**

**Part 4. Raman spectra for deuterated rest of the water molecules apart and C4CW molecule.**

**Part 1. The Cartesian coordinates of the optimized structures of different clusters.**

n=17

|   |             |             |             |
|---|-------------|-------------|-------------|
| O | 0.12203400  | 0.00664300  | -0.07093600 |
| H | 0.81264400  | 0.52680800  | -0.54115700 |
| H | -0.50773000 | -0.26900500 | -0.77757700 |
| O | 2.02667600  | 1.30733500  | -1.53018900 |
| H | 2.40956800  | 1.88915900  | -0.84175400 |
| H | 2.66012700  | 0.57139000  | -1.65348800 |
| O | -1.47506900 | -0.67186000 | -2.14746500 |
| H | -2.38726700 | -0.65700100 | -1.78766400 |
| H | -1.20854100 | -1.61241600 | -2.19187500 |
| O | 1.33897600  | -1.72185300 | 1.59449100  |
| H | 0.68819400  | -1.90400400 | 2.29586400  |
| H | 0.84934300  | -1.14010100 | 0.96670600  |
| O | -1.13621900 | 0.91771200  | 2.12598100  |
| H | -0.66744400 | 0.59971500  | 1.31928400  |
| H | -1.18936600 | 0.12852800  | 2.69419100  |
| O | 2.68118300  | 2.51474100  | 0.82940700  |
| H | 3.27577200  | 3.23549400  | 1.05489200  |
| H | 1.75939400  | 2.80405000  | 1.10827900  |
| O | -0.61754000 | -3.19555800 | -1.53598700 |
| H | 0.35509100  | -3.16120800 | -1.28523300 |
| H | -0.75582000 | -4.03917400 | -1.97547700 |
| O | -3.72598500 | -0.58314900 | -0.63103200 |
| H | -3.60711600 | 0.31021500  | -0.17151700 |
| H | -4.65793100 | -0.67525500 | -0.84612700 |
| O | -1.43382300 | 3.26250500  | -0.80463000 |
| H | -1.05441900 | 2.74481000  | -1.57527700 |
| H | -1.70408900 | 4.11602500  | -1.15547900 |

|      |             |             |             |
|------|-------------|-------------|-------------|
| O    | -3.26013700 | 1.64701500  | 0.56793900  |
| H    | -2.74906200 | 2.27379900  | 0.01909300  |
| H    | -2.64104500 | 1.41129900  | 1.29209000  |
| O    | -2.26701700 | -2.57133500 | 0.70133000  |
| H    | -1.67645500 | -2.87313700 | -0.01416600 |
| H    | -2.86187900 | -1.91095300 | 0.29660000  |
| O    | 0.25208300  | 3.22014100  | 1.44634300  |
| H    | -0.30477200 | 3.32092100  | 0.64847800  |
| H    | -0.20121800 | 2.54266300  | 1.98108600  |
| O    | 3.60753500  | -0.91917100 | -1.21666900 |
| H    | 3.69906900  | -0.65252300 | -0.25246100 |
| H    | 4.49194000  | -1.10136400 | -1.54639500 |
| O    | -1.10466100 | -1.77937800 | 2.93067600  |
| H    | -1.58309800 | -2.11815400 | 2.12271600  |
| H    | -1.45311100 | -2.26122300 | 3.68520200  |
| O    | -0.40522900 | 1.86219400  | -2.76841400 |
| H    | -0.79861800 | 0.97077400  | -2.77954400 |
| H    | 0.53384300  | 1.72875600  | -2.54155000 |
| O    | 3.56086200  | -0.13706600 | 1.27381200  |
| H    | 2.84064900  | -0.67954900 | 1.65369600  |
| H    | 3.25516600  | 0.78923500  | 1.29063400  |
| O    | 1.85631700  | -3.11020500 | -0.71972400 |
| H    | 2.46285100  | -2.43331800 | -1.07355900 |
| H    | 1.75544200  | -2.86495000 | 0.22203900  |
| n=19 |             |             |             |
| O    | 3.68498600  | -1.47532100 | -0.41199300 |
| H    | 3.28113000  | -1.61080300 | -1.29043200 |
| H    | 2.97187600  | -1.69856100 | 0.22456900  |

|   |             |             |             |
|---|-------------|-------------|-------------|
| O | -0.20607700 | -3.64537400 | 0.38384200  |
| H | 0.50738100  | -3.09009200 | 0.79443500  |
| H | -0.04139400 | -4.56033600 | 0.62824700  |
| O | 1.80709800  | 1.10552500  | -1.91120200 |
| H | 2.62774400  | 1.26669100  | -1.40078400 |
| H | 1.96264800  | 0.28052000  | -2.41608500 |
| O | -1.30619500 | -0.40796200 | 3.29456500  |
| H | -0.34726900 | -0.38982200 | 3.45614400  |
| H | -1.47894800 | 0.42297800  | 2.81166900  |
| O | -1.93131200 | -0.76759300 | -1.91525900 |
| H | -2.11259100 | 0.11570600  | -2.29851000 |
| H | -2.71927400 | -0.99940700 | -1.37275300 |
| O | 1.45592900  | -1.77160300 | 1.15907800  |
| H | 0.90329700  | -1.09852600 | 0.68222700  |
| H | 1.55912700  | -1.40037500 | 2.06095000  |
| O | -0.10322600 | 3.11209100  | -1.87638400 |
| H | 0.01830700  | 3.38636200  | -0.94657500 |
| H | 0.63325700  | 2.49887200  | -2.05825600 |
| O | 0.00364000  | 0.01457400  | -0.18323500 |
| H | -0.68927300 | -0.34731100 | -0.78647200 |
| H | 0.64221400  | 0.48396300  | -0.76862200 |
| O | 2.31066300  | 1.90525500  | 1.96489100  |
| H | 1.65519400  | 2.52681200  | 1.59433800  |
| H | 2.91554000  | 1.66212700  | 1.23786900  |
| O | -3.68999600 | 1.61809200  | 0.04091500  |
| H | -3.37643400 | 1.80539600  | -0.86230400 |
| H | -3.92304500 | 0.67045700  | 0.04616000  |
| O | -2.35069700 | 1.90106100  | -2.43315900 |
| H | -2.72235000 | 2.32398400  | -3.21209500 |

|   |             |             |             |
|---|-------------|-------------|-------------|
| H | -1.50310400 | 2.39424100  | -2.21673600 |
| O | 3.91355200  | 1.09053900  | -0.16956500 |
| H | 4.81467300  | 1.41454600  | -0.24996600 |
| H | 3.93971100  | 0.08417400  | -0.22241000 |
| O | -1.42977500 | 1.66366900  | 1.43931300  |
| H | -2.32052700 | 1.72690200  | 1.00193800  |
| H | -0.91867400 | 1.04725400  | 0.86497800  |
| O | 0.27107100  | 3.53356700  | 0.88822900  |
| H | -0.47874100 | 2.94235100  | 1.19447100  |
| H | 0.15111000  | 4.39351000  | 1.30099300  |
| O | -0.04137400 | -2.74747300 | -2.28787600 |
| H | -0.78933400 | -2.12032300 | -2.32509900 |
| H | -0.10124700 | -3.16922300 | -1.40908900 |
| O | 2.17972600  | -1.48388100 | -2.78682800 |
| H | 1.33191400  | -1.99249400 | -2.59962800 |
| H | 2.50096700  | -1.79487300 | -3.63777600 |
| O | -2.36771700 | -2.27900800 | 1.66733500  |
| H | -1.94621700 | -1.65397100 | 2.30871000  |
| H | -1.65809300 | -2.80414500 | 1.25874500  |
| O | -3.87220500 | -1.17510800 | -0.08647200 |
| H | -4.69226800 | -1.67131200 | -0.15432700 |
| H | -3.31737800 | -1.61292700 | 0.64143000  |
| O | 1.53208200  | -0.17706100 | 3.35773500  |
| H | 2.02937600  | -0.19569500 | 4.17959700  |
| H | 1.80929700  | 0.65144200  | 2.86902800  |

n=20

|   |             |            |             |
|---|-------------|------------|-------------|
| O | -0.05162900 | 2.79343000 | -2.69263500 |
| H | -0.98619000 | 2.51542500 | -2.61907100 |

|   |             |             |             |
|---|-------------|-------------|-------------|
| H | 0.46620600  | 1.96630900  | -2.74666100 |
| O | -0.25475400 | 0.01965200  | -0.10809400 |
| H | -0.02148500 | -0.67260400 | 0.55408600  |
| H | -0.38083600 | 0.87679600  | 0.36282000  |
| O | -1.10042900 | -3.80773200 | 0.15853100  |
| H | -1.98165300 | -3.31133100 | 0.12281900  |
| H | -1.29984400 | -4.72847600 | 0.34836000  |
| O | -1.34560400 | -0.50627500 | 3.26094600  |
| H | -0.74388400 | -1.13841400 | 2.81975900  |
| H | -0.80068900 | 0.28614400  | 3.42990000  |
| O | 3.94353200  | -1.19408800 | -0.52344000 |
| H | 3.39247100  | -1.49545200 | -1.27559800 |
| H | 3.99001000  | -0.22982600 | -0.57175200 |
| O | 1.41539500  | 0.55913700  | -2.10145600 |
| H | 1.76068200  | -0.24688200 | -2.52830600 |
| H | 0.80048600  | 0.24839600  | -1.39152800 |
| O | -2.66321600 | 1.79877700  | -2.38582000 |
| H | -2.92097600 | 1.88803700  | -1.41915300 |
| H | -3.35859500 | 2.21912900  | -2.89917700 |
| O | -1.96484100 | -0.86607500 | -1.97058000 |
| H | -2.33119500 | -0.07941600 | -2.41323000 |
| H | -1.40748300 | -0.48605000 | -1.25050100 |
| O | 2.57620100  | 0.86661700  | 2.32002100  |
| H | 2.70530000  | 1.18871100  | 1.39817100  |
| H | 2.74722800  | -0.09166500 | 2.29699100  |
| O | 2.97191000  | 1.75806000  | -0.24577800 |
| H | 2.65412800  | 2.67543800  | -0.27135900 |
| H | 2.45077600  | 1.33113700  | -0.96372800 |
| O | 0.39779600  | 1.67268300  | 3.42609600  |

|   |             |             |             |
|---|-------------|-------------|-------------|
| H | 0.59174300  | 2.15103500  | 4.23644500  |
| H | 1.27562100  | 1.34833400  | 3.04773500  |
| O | -3.46256300 | -0.30673200 | 1.74483900  |
| H | -4.23161900 | -0.30571700 | 2.32224900  |
| H | -2.65989400 | -0.33981500 | 2.34657400  |
| O | 0.28387100  | -1.99045100 | 1.61270400  |
| H | 1.24965800  | -2.11618700 | 1.71752300  |
| H | -0.10135100 | -2.78179400 | 1.17814700  |
| O | -0.60089600 | 2.46020000  | 1.04218100  |
| H | 0.00028300  | 3.07862200  | 0.57152900  |
| H | -0.29031400 | 2.37810800  | 1.96806400  |
| O | 1.04704800  | 3.88284300  | -0.58968500 |
| H | 1.08434400  | 4.84078700  | -0.65568900 |
| H | 0.61011300  | 3.54976100  | -1.43085700 |
| O | -0.10672400 | -2.90535500 | -2.31030600 |
| H | -0.77502700 | -2.20261000 | -2.43673800 |
| H | -0.37000200 | -3.35249100 | -1.48321600 |
| O | -3.16100300 | 2.00970600  | 0.16706400  |
| H | -3.35746600 | 1.18638800  | 0.65487500  |
| H | -2.32015200 | 2.32628500  | 0.55372100  |
| O | -3.23501200 | -2.38306200 | -0.08561100 |
| H | -2.99996500 | -1.85582400 | -0.87795400 |
| H | -3.37693000 | -1.71647000 | 0.61728800  |
| O | 2.99090200  | -1.86937200 | 1.80730700  |
| H | 3.60853300  | -2.42027400 | 2.29551700  |
| H | 3.39354900  | -1.68791700 | 0.90936000  |
| O | 2.30170500  | -1.99032900 | -2.60851900 |
| H | 2.68244900  | -2.39846800 | -3.39084700 |
| H | 1.39845100  | -2.41021000 | -2.46869700 |

n=21

|   |             |             |             |
|---|-------------|-------------|-------------|
| O | -3.09578500 | 1.15277800  | -2.25360900 |
| H | -3.91637500 | 1.49198100  | -2.62061000 |
| H | -2.63774800 | 1.92456300  | -1.80608100 |
| O | -1.92871200 | 3.09895400  | -0.96278800 |
| H | -0.99557300 | 3.32541500  | -1.14043700 |
| H | -2.03859800 | 3.04660100  | 0.00662200  |
| O | -2.71778100 | -0.59299300 | -0.23609600 |
| H | -3.01711900 | -0.07107400 | -1.01216700 |
| H | -2.77006900 | -1.54979200 | -0.44392200 |
| O | -1.16489400 | -0.36477900 | -3.70182400 |
| H | -1.93083400 | 0.11141800  | -3.33874900 |
| H | -0.40227200 | 0.17788000  | -3.41902000 |
| O | -3.05726100 | 0.41398900  | 2.27513500  |
| H | -3.08717700 | -0.00361800 | 1.38912800  |
| H | -2.44108000 | -0.13930400 | 2.79506900  |
| O | -2.20137500 | 2.80561700  | 1.80726400  |
| H | -2.58793700 | 1.90274200  | 2.04072900  |
| H | -2.68526700 | 3.46679100  | 2.30910600  |
| O | -2.29487800 | -3.24065100 | -0.51552500 |
| H | -2.90183200 | -3.98258500 | -0.58150800 |
| H | -1.80144200 | -3.32914700 | 0.35846700  |
| O | -0.50019600 | -2.74536600 | -2.63978800 |
| H | -0.80878200 | -1.90208700 | -3.05721800 |
| H | -1.13178800 | -2.96355400 | -1.93032100 |
| O | 0.76150200  | 3.60072400  | -1.58434100 |
| H | 1.42860200  | 3.46944700  | -0.84268800 |
| H | 0.98457800  | 4.41933500  | -2.03507100 |



|   |             |             |             |
|---|-------------|-------------|-------------|
| O | 0.82928100  | 0.97521800  | -2.36252000 |
| H | 0.47433100  | 0.66148300  | -1.49685800 |
| H | 0.83107400  | 1.95081100  | -2.29942700 |
| O | -0.08536400 | 0.01675000  | 0.00799100  |
| H | -1.03673600 | -0.23402500 | -0.07464600 |
| H | 0.41062300  | -0.80289000 | 0.23757100  |
| O | -1.23330900 | -1.28019100 | 3.55837000  |
| H | -1.46007400 | -1.54640800 | 4.45421100  |
| H | -0.33315600 | -0.83982900 | 3.61570900  |
| O | 0.37971700  | 1.91763300  | 1.85786100  |
| H | -0.45720400 | 2.40759100  | 1.98871700  |
| H | 0.16353900  | 1.23444400  | 1.17541300  |
| O | -0.90118300 | -3.31570000 | 1.66509600  |
| H | -0.00528300 | -3.05620400 | 1.36686600  |
| H | -1.12546100 | -2.66294100 | 2.35729700  |
| O | 2.35119100  | 3.07704300  | 0.40024800  |
| H | 2.95079600  | 2.32011100  | 0.26555100  |
| H | 1.69200400  | 2.76313900  | 1.05794500  |
| O | 1.94706100  | -2.82197300 | -1.90717000 |
| H | 2.33838400  | -3.62009700 | -2.27239600 |
| H | 0.98545000  | -2.78836000 | -2.24089100 |
| O | 1.36994000  | -2.20737800 | 0.63721500  |
| H | 1.70771400  | -2.54461200 | -0.22373100 |
| H | 2.12913600  | -1.90110100 | 1.17113700  |
| O | 3.16919300  | -0.31775200 | -2.05908500 |
| H | 2.37877400  | 0.21254100  | -2.31565600 |
| H | 2.85251300  | -1.24257500 | -2.06184700 |
| O | 1.03957500  | 0.00433500  | 3.65754400  |
| H | 1.83925300  | -0.35823200 | 3.24034800  |

|   |            |             |             |
|---|------------|-------------|-------------|
| H | 0.83593800 | 0.81451300  | 3.13911800  |
| O | 3.97275000 | 0.74321700  | 0.12142900  |
| H | 4.89300700 | 0.99181300  | -0.00867100 |
| H | 3.67637000 | 0.28332000  | -0.73891400 |
| O | 3.27827600 | -0.90661500 | 2.11099000  |
| H | 3.60816500 | -0.25629400 | 1.43800500  |
| H | 4.04955500 | -1.28409800 | 2.54263300  |

n=23

0 1

|   |             |             |             |
|---|-------------|-------------|-------------|
| O | -2.52669300 | -0.10360800 | 2.06757700  |
| H | -2.22433900 | -1.00114700 | 2.37058800  |
| H | -1.95924000 | 0.06940400  | 1.27053600  |
| O | -0.86321400 | 0.56012900  | 0.14871400  |
| H | -0.07986200 | 0.61428200  | 0.74406700  |
| H | -0.61293800 | -0.00108700 | -0.62935900 |
| O | -0.13919400 | -0.82073300 | -1.97776000 |
| H | 0.06020900  | -1.69614900 | -1.56277500 |
| H | -0.96278100 | -0.88809500 | -2.50787500 |
| O | 1.93559000  | 0.95571900  | -2.00886300 |
| H | 1.17984900  | 0.33380700  | -2.08023700 |
| H | 2.71794200  | 0.42360100  | -2.25692200 |
| O | 1.19382000  | -1.97946900 | 1.92872700  |
| H | 1.16762700  | -1.00318900 | 2.04016200  |
| H | 2.14312600  | -2.21102300 | 1.96794200  |
| O | 0.47160500  | -2.95062800 | -0.49772900 |
| H | 0.69566400  | -2.55229800 | 0.37893800  |
| H | -0.33794200 | -3.47731400 | -0.33582300 |
| O | 1.03662700  | 0.70467500  | 2.03333900  |

|   |             |             |             |
|---|-------------|-------------|-------------|
| H | 1.72371600  | 1.25254200  | 1.57335500  |
| H | 0.52302300  | 1.24191800  | 2.66277000  |
| O | 2.70484500  | 1.92925400  | 0.41165000  |
| H | 2.36819200  | 1.59443200  | -0.45520800 |
| H | 2.49711000  | 2.88718900  | 0.42645700  |
| O | -1.72203900 | 2.84952800  | -0.93775900 |
| H | -1.35467500 | 2.02651800  | -0.53844600 |
| H | -1.00670000 | 3.14699800  | -1.54591300 |
| O | -2.64174200 | -0.78976700 | -3.02853400 |
| H | -3.05385300 | 0.05020400  | -2.64450100 |
| H | -2.89592000 | -0.83276300 | -3.95457900 |
| O | -1.99296900 | -3.92892300 | 0.22384100  |
| H | -2.31049400 | -4.83605900 | 0.21141300  |
| H | -2.66756300 | -3.37675900 | -0.27534900 |
| O | 1.56168700  | 4.39890500  | 0.35055800  |
| H | 1.88923200  | 5.28143100  | 0.54310100  |
| H | 0.68599300  | 4.29559800  | 0.82653800  |
| O | 4.05567800  | -0.80992300 | -2.16197700 |
| H | 4.65525400  | -0.98075300 | -2.89338100 |
| H | 3.69254400  | -1.69564400 | -1.86588300 |
| O | 3.89655400  | -2.30753900 | 1.47062500  |
| H | 4.22019600  | -1.40611700 | 1.17597000  |
| H | 4.58364100  | -2.68537200 | 2.02628200  |
| O | -3.70153300 | -2.44223400 | -1.05018800 |
| H | -4.12121000 | -1.74503900 | -0.51075800 |
| H | -3.34678900 | -1.98079700 | -1.83516700 |
| O | -3.73419400 | 1.23937000  | -1.86875800 |
| H | -4.11200100 | 0.89142900  | -1.04132800 |
| H | -3.10654000 | 1.95260100  | -1.61558300 |

|   |             |             |             |
|---|-------------|-------------|-------------|
| O | -0.81708400 | 4.04286200  | 1.38811700  |
| H | -0.97203400 | 3.36024000  | 2.06441700  |
| H | -1.31913100 | 3.75611900  | 0.59513500  |
| O | -1.14390000 | 1.89125300  | 3.26274500  |
| H | -1.38044500 | 2.09824600  | 4.17098100  |
| H | -1.75455500 | 1.17131200  | 2.96047000  |
| O | 4.70025000  | -0.02878900 | 0.45525900  |
| H | 4.15774400  | 0.76883100  | 0.59733400  |
| H | 4.65118600  | -0.19836600 | -0.50469200 |
| O | 3.18353100  | -3.06232100 | -1.14453100 |
| H | 3.48500600  | -3.00479400 | -0.21833600 |
| H | 2.21945800  | -3.20018800 | -1.08778500 |
| O | -4.60227800 | -0.22880700 | 0.41845000  |
| H | -3.94336300 | -0.17115700 | 1.16003100  |
| H | -5.47894400 | -0.13570400 | 0.80114800  |
| O | -1.50674800 | -2.52071500 | 2.61181700  |
| H | -0.53549600 | -2.46018200 | 2.59298700  |
| H | -1.73685700 | -3.10469400 | 1.86449600  |
| O | 0.62180100  | 3.50043100  | -2.20234400 |
| H | 1.14296800  | 2.69492700  | -2.35853700 |
| H | 1.05077200  | 3.94370300  | -1.45051800 |

n=25

|   |             |             |             |
|---|-------------|-------------|-------------|
| O | -0.57805200 | -0.14836800 | -2.23784100 |
| H | 0.04067400  | -0.04911600 | -1.47226000 |
| H | -1.11896000 | 0.66943500  | -2.18928100 |
| O | 1.79637100  | -0.97822300 | -3.49820100 |
| H | 2.46826300  | -0.32141300 | -3.20021400 |
| H | 0.92077100  | -0.59416600 | -3.30971000 |

|   |             |             |             |
|---|-------------|-------------|-------------|
| O | 1.09864200  | 0.21206500  | -0.20233000 |
| H | 0.57859200  | 0.19507900  | 0.63807600  |
| H | 1.75152700  | -0.52635300 | -0.14337500 |
| O | 1.96021600  | 2.57501500  | -1.13309900 |
| H | 2.32215800  | 3.04233200  | -0.35495800 |
| H | 1.62442000  | 1.71980400  | -0.76327900 |
| O | -2.06526900 | -2.11445300 | -1.23032300 |
| H | -3.01326100 | -1.94900300 | -1.40849800 |
| H | -1.55973900 | -1.39065300 | -1.68424800 |
| O | 3.39416100  | 1.24668800  | 2.25869800  |
| H | 2.97552900  | 2.08335900  | 1.97873500  |
| H | 3.87118700  | 0.89044400  | 1.48355600  |
| O | -1.97271100 | 2.10712800  | -1.54192800 |
| H | -1.47800400 | 2.90140800  | -1.82039200 |
| H | -1.87931700 | 2.09484000  | -0.55967200 |
| O | 2.85363800  | -1.84565800 | 0.01093800  |
| H | 2.62349700  | -2.31430600 | 0.86347100  |
| H | 2.68801000  | -2.45166500 | -0.74439900 |
| O | -4.61214300 | 1.30497300  | -1.33940900 |
| H | -4.70498900 | 1.54335300  | -0.39855800 |
| H | -3.74778900 | 1.67534300  | -1.60767400 |
| O | -4.49019200 | 1.47876000  | 1.47715400  |
| H | -4.50688900 | 0.47952600  | 1.58153700  |
| H | -5.13866100 | 1.84095900  | 2.08696400  |
| O | 2.31211300  | 3.66738500  | 1.37537500  |
| H | 1.34523900  | 3.93489300  | 1.35857500  |
| H | 2.80502800  | 4.42527900  | 1.70185400  |
| O | 1.80364900  | -0.36136300 | 3.54375200  |
| H | 1.95885900  | -0.24198400 | 4.48472000  |

|   |             |             |             |
|---|-------------|-------------|-------------|
| H | 2.44498200  | 0.24848600  | 3.06567400  |
| O | 2.14526500  | -2.86374700 | 2.31224000  |
| H | 1.30107500  | -3.34155300 | 2.19451700  |
| H | 1.97445100  | -2.07634800 | 2.86174300  |
| O | -0.39317800 | 0.11036400  | 2.01797100  |
| H | 0.25373600  | -0.03122700 | 2.74037400  |
| H | -0.93045500 | -0.71572000 | 1.90069700  |
| O | -1.87575800 | -2.01286900 | 1.44166300  |
| H | -1.90194700 | -2.02511000 | 0.44885700  |
| H | -1.42076900 | -2.84439600 | 1.68630900  |
| O | -0.22596800 | -4.16661900 | -0.98970900 |
| H | 0.56806400  | -3.85296900 | -1.46789900 |
| H | -0.95426900 | -3.56554000 | -1.24106100 |
| O | -0.19548500 | -4.17983100 | 1.60132700  |
| H | -0.37019100 | -5.06782100 | 1.92531800  |
| H | -0.14773200 | -4.23858700 | 0.59600300  |
| O | -4.69711100 | -1.30315800 | -1.29016100 |
| H | -5.41162600 | -1.63966200 | -1.83768900 |
| H | -4.68161100 | -0.30544800 | -1.40139600 |
| O | -1.86043700 | 2.19293600  | 1.18509900  |
| H | -2.79689700 | 2.04885900  | 1.43620900  |
| H | -1.34250500 | 1.46642900  | 1.60162500  |
| O | 3.63786500  | 0.82513500  | -2.53875100 |
| H | 4.13240700  | 0.53223200  | -1.75428600 |
| H | 3.15761400  | 1.60976400  | -2.22021900 |
| O | -0.18842400 | 4.36913400  | 1.05252500  |
| H | -0.85575400 | 3.67824900  | 1.24496200  |
| H | -0.25670000 | 4.51633100  | 0.09273000  |
| O | -4.50139500 | -1.12713100 | 1.51262700  |

|   |             |             |             |
|---|-------------|-------------|-------------|
| H | -3.62225800 | -1.52070500 | 1.68077000  |
| H | -4.70754900 | -1.35837900 | 0.58735400  |
| O | 2.07216400  | -3.17799200 | -2.20783600 |
| H | 1.95306800  | -2.33927000 | -2.76799300 |
| H | 2.57972000  | -3.79876400 | -2.73801700 |
| O | 4.64692500  | 0.03488000  | 0.04171700  |
| H | 4.09448800  | -0.79328700 | 0.03928700  |
| H | 5.56051100  | -0.22968400 | 0.18102300  |
| O | -0.09534200 | 4.11800700  | -1.77525800 |
| H | 0.70943900  | 3.54324400  | -1.66062600 |
| H | 0.08820300  | 4.73902600  | -2.48515200 |

## Part 2. Interaction energy details.

$$E_{int} = E_{total} - E_C - E_{cage}$$

$$E_{int(C-NN4W)} = E_{C-NN4W} - E_C - E_{NN4W}$$

$$E_{int(C-rest)} = E_{C-rest} - E_C - E_{rest}$$

where  $E_{int}$  stands for the interaction energy between C4CW molecule and overall water cage;  $E_{total}$  stands for the total energy of water cluster;  $E_{cage}$  stands for the total energy of overall water cage;  $E_C$  stands for the total energy of C4CW molecule;  $E_{C-NN4W}$  stands for the total energy of C4CW molecule and its NN4W molecules;  $E_{NN4W}$  stands for the total energy of the NN4W molecules;  $E_{int(C-NN4W)}$  stands for the interaction energy between C4CW molecule and its NN4W molecules;  $E_{C-rest}$  stands for the total energy of C4CW molecule and rest water molecules;  $E_{rest}$  stands for the total energy of rest water molecules;  $E_{int(C-rest)}$  stands for the interaction energy between C4CW molecule and rest water molecules.

## Part 3. The mass-weighted atomic displacements of these O-H stretching modes for n=17

112

113

114

|                | A         |       |       | A         |       |       | A         |       |       |       |
|----------------|-----------|-------|-------|-----------|-------|-------|-----------|-------|-------|-------|
| Frequencies -- | 1767.8195 |       |       | 1777.0942 |       |       | 2943.9620 |       |       |       |
| Red. masses -- | 1.0617    |       |       | 1.0650    |       |       | 1.0729    |       |       |       |
| Frc consts --  | 1.9549    |       |       | 1.9816    |       |       | 5.4788    |       |       |       |
| IR Inten --    | 25.7654   |       |       | 41.8102   |       |       | 1022.9196 |       |       |       |
| Raman Activ -- | 0.3865    |       |       | 0.4378    |       |       | 129.2904  |       |       |       |
| Depolar (P) -- | 0.4342    |       |       | 0.4872    |       |       | 0.0936    |       |       |       |
| Depolar (U) -- | 0.6055    |       |       | 0.6552    |       |       | 0.1712    |       |       |       |
| Atom           | AN        | X     | Y     | Z         | X     | Y     | Z         | X     | Y     | Z     |
| 1              | 8         | 0.00  | -0.01 | 0.02      | 0.00  | 0.00  | -0.03     | 0.00  | 0.00  | 0.00  |
| 2              | 1         | -0.13 | -0.03 | -0.23     | 0.17  | 0.04  | 0.30      | 0.00  | 0.00  | 0.00  |
| 3              | 1         | 0.14  | 0.12  | -0.18     | -0.19 | -0.14 | 0.22      | -0.02 | -0.01 | -0.03 |
| 4              | 8         | 0.00  | 0.00  | 0.00      | 0.00  | 0.00  | 0.00      | 0.00  | 0.00  | 0.00  |
| 5              | 1         | 0.08  | -0.04 | -0.01     | -0.03 | -0.01 | 0.02      | 0.00  | 0.00  | 0.00  |
| 6              | 1         | 0.03  | 0.03  | 0.03      | 0.00  | 0.00  | 0.01      | 0.00  | 0.00  | 0.00  |
| 7              | 8         | 0.01  | 0.01  | 0.00      | 0.00  | 0.00  | 0.00      | 0.01  | 0.00  | 0.00  |
| 8              | 1         | -0.01 | -0.20 | -0.01     | 0.01  | -0.01 | 0.02      | -0.08 | 0.00  | 0.02  |
| 9              | 1         | -0.15 | -0.04 | 0.05      | -0.02 | -0.01 | 0.02      | 0.00  | 0.00  | 0.00  |
| 10             | 8         | 0.01  | 0.00  | 0.00      | -0.03 | 0.01  | 0.01      | 0.00  | 0.00  | 0.00  |
| 11             | 1         | -0.06 | 0.05  | -0.04     | 0.22  | -0.17 | 0.15      | 0.00  | 0.00  | 0.00  |
| 12             | 1         | -0.09 | -0.01 | 0.07      | 0.32  | 0.02  | -0.24     | 0.00  | 0.00  | 0.00  |
| 13             | 8         | 0.00  | 0.00  | 0.00      | 0.01  | -0.03 | 0.00      | 0.00  | 0.00  | 0.00  |
| 14             | 1         | -0.01 | 0.03  | -0.01     | -0.04 | 0.35  | -0.17     | 0.01  | -0.01 | -0.03 |
| 15             | 1         | 0.02  | 0.00  | 0.01      | -0.14 | 0.16  | 0.21      | 0.00  | -0.01 | 0.01  |
| 16             | 8         | 0.00  | -0.01 | 0.00      | 0.00  | 0.00  | 0.00      | 0.00  | 0.00  | 0.00  |
| 17             | 1         | -0.06 | 0.04  | 0.03      | 0.00  | 0.00  | 0.00      | 0.00  | 0.00  | 0.00  |
| 18             | 1         | 0.06  | 0.11  | 0.04      | 0.00  | -0.01 | 0.00      | 0.05  | -0.02 | -0.02 |
| 19             | 8         | 0.00  | 0.00  | 0.00      | 0.00  | 0.00  | 0.00      | 0.00  | 0.00  | 0.00  |
| 20             | 1         | 0.01  | -0.06 | -0.03     | 0.00  | -0.03 | -0.02     | -0.05 | 0.00  | -0.01 |



|    |   |       |       |       |       |       |       |       |       |       |
|----|---|-------|-------|-------|-------|-------|-------|-------|-------|-------|
| 21 | 1 | 0.04  | -0.01 | 0.00  | 0.02  | 0.00  | 0.00  | 0.00  | 0.00  | 0.00  |
| 22 | 8 | 0.01  | 0.00  | 0.00  | 0.00  | 0.00  | 0.00  | -0.01 | -0.06 | -0.03 |
| 23 | 1 | -0.20 | 0.02  | -0.02 | -0.05 | 0.00  | -0.01 | 0.10  | 0.86  | 0.45  |
| 24 | 1 | -0.02 | 0.10  | 0.05  | 0.00  | 0.03  | 0.01  | -0.06 | -0.01 | -0.01 |
| 25 | 8 | 0.00  | 0.00  | 0.01  | 0.00  | 0.00  | 0.00  | 0.00  | 0.00  | 0.01  |
| 26 | 1 | -0.02 | 0.11  | -0.07 | 0.00  | 0.02  | -0.02 | 0.04  | -0.06 | -0.09 |
| 27 | 1 | 0.03  | -0.03 | -0.09 | 0.01  | -0.01 | -0.02 | 0.00  | 0.01  | 0.00  |
| 28 | 8 | -0.03 | -0.02 | -0.01 | -0.02 | -0.01 | 0.00  | -0.01 | 0.00  | 0.00  |
| 29 | 1 | 0.29  | -0.01 | 0.26  | 0.16  | -0.01 | 0.13  | 0.04  | 0.06  | -0.03 |
| 30 | 1 | 0.28  | 0.28  | -0.14 | 0.16  | 0.13  | -0.08 | 0.05  | -0.01 | 0.07  |
| 31 | 8 | 0.00  | 0.00  | 0.01  | 0.00  | 0.00  | 0.01  | 0.00  | 0.00  | 0.00  |
| 32 | 1 | -0.07 | 0.07  | -0.08 | -0.04 | 0.05  | -0.06 | 0.00  | 0.00  | 0.00  |
| 33 | 1 | 0.05  | -0.03 | -0.12 | 0.04  | -0.02 | -0.08 | -0.04 | 0.04  | -0.02 |
| 34 | 8 | 0.02  | 0.01  | 0.00  | 0.01  | 0.01  | 0.00  | 0.00  | 0.00  | 0.00  |
| 35 | 1 | -0.19 | -0.18 | 0.11  | -0.11 | -0.11 | 0.06  | 0.00  | 0.00  | 0.01  |
| 36 | 1 | -0.21 | -0.01 | -0.18 | -0.11 | -0.03 | -0.12 | 0.00  | 0.00  | -0.01 |
| 37 | 8 | 0.00  | 0.00  | 0.00  | 0.00  | 0.00  | 0.00  | 0.00  | 0.00  | 0.00  |
| 38 | 1 | 0.00  | 0.01  | 0.00  | -0.06 | 0.00  | 0.01  | 0.00  | 0.00  | -0.01 |
| 39 | 1 | 0.00  | 0.00  | 0.00  | -0.01 | 0.00  | -0.03 | 0.00  | 0.00  | 0.00  |
| 40 | 8 | 0.00  | 0.00  | 0.00  | 0.00  | 0.00  | -0.01 | 0.00  | 0.00  | 0.00  |
| 41 | 1 | -0.01 | -0.02 | 0.02  | -0.03 | -0.03 | 0.04  | -0.03 | -0.02 | -0.05 |
| 42 | 1 | -0.01 | -0.01 | -0.01 | 0.00  | 0.00  | -0.01 | 0.00  | 0.00  | 0.00  |
| 43 | 8 | -0.01 | 0.02  | 0.00  | 0.01  | -0.01 | 0.00  | 0.00  | 0.00  | 0.00  |
| 44 | 1 | 0.23  | -0.10 | 0.05  | -0.13 | 0.06  | -0.04 | -0.01 | -0.02 | 0.00  |
| 45 | 1 | -0.04 | -0.25 | 0.01  | 0.02  | 0.15  | -0.01 | 0.01  | 0.00  | 0.00  |
| 46 | 8 | -0.01 | 0.00  | 0.00  | 0.01  | 0.00  | 0.00  | 0.00  | 0.00  | 0.00  |
| 47 | 1 | 0.04  | -0.06 | -0.01 | -0.05 | 0.05  | -0.01 | 0.00  | 0.00  | 0.00  |
| 48 | 1 | 0.06  | 0.02  | -0.03 | -0.06 | -0.02 | 0.02  | 0.00  | -0.01 | 0.00  |
| 49 | 8 | 0.00  | 0.00  | 0.00  | -0.01 | -0.01 | -0.01 | 0.00  | 0.00  | 0.00  |

|                |    |           |       |       |           |       |       |           |       |       |
|----------------|----|-----------|-------|-------|-----------|-------|-------|-----------|-------|-------|
| 50             | 1  | 0.00      | 0.00  | 0.01  | 0.01      | 0.06  | 0.12  | 0.00      | 0.00  | 0.00  |
| 51             | 1  | 0.02      | 0.01  | 0.00  | 0.08      | 0.11  | -0.02 | 0.00      | 0.00  | -0.01 |
|                |    | 115       |       |       | 116       |       |       | 117       |       |       |
|                |    | A         |       |       | A         |       |       | A         |       |       |
| Frequencies -- |    | 3048.5998 |       |       | 3070.2469 |       |       | 3089.7410 |       |       |
| Red. masses -- |    | 1.0702    |       |       | 1.0704    |       |       | 1.0707    |       |       |
| Frc consts --  |    | 5.8605    |       |       | 5.9446    |       |       | 6.0224    |       |       |
| IR Inten --    |    | 337.3819  |       |       | 1785.0819 |       |       | 583.6016  |       |       |
| Raman Activ -- |    | 391.3410  |       |       | 61.1265   |       |       | 28.5068   |       |       |
| Depolar (P) -- |    | 0.0382    |       |       | 0.1428    |       |       | 0.7489    |       |       |
| Depolar (U) -- |    | 0.0735    |       |       | 0.2499    |       |       | 0.8564    |       |       |
| Atom           | AN | X         | Y     | Z     | X         | Y     | Z     | X         | Y     | Z     |
| 1              | 8  | 0.00      | 0.00  | 0.00  | 0.00      | 0.00  | 0.00  | 0.00      | 0.00  | 0.00  |
| 2              | 1  | -0.02     | -0.02 | 0.02  | 0.00      | -0.01 | 0.01  | 0.01      | 0.01  | 0.00  |
| 3              | 1  | 0.01      | 0.00  | 0.01  | -0.03     | -0.01 | -0.04 | 0.01      | 0.00  | 0.01  |
| 4              | 8  | 0.00      | 0.00  | 0.00  | 0.00      | 0.00  | 0.00  | 0.00      | 0.01  | 0.00  |
| 5              | 1  | -0.03     | -0.04 | -0.04 | -0.02     | -0.03 | -0.03 | -0.02     | -0.03 | -0.02 |
| 6              | 1  | -0.02     | 0.03  | 0.01  | 0.00      | 0.00  | 0.00  | 0.05      | -0.06 | -0.02 |
| 7              | 8  | 0.00      | 0.00  | 0.00  | 0.00      | 0.00  | 0.00  | 0.00      | 0.00  | 0.00  |
| 8              | 1  | 0.01      | 0.00  | 0.00  | 0.00      | 0.00  | 0.00  | 0.00      | 0.00  | 0.00  |
| 9              | 1  | -0.01     | 0.03  | 0.01  | 0.02      | -0.06 | -0.01 | -0.01     | 0.03  | 0.01  |
| 10             | 8  | 0.00      | 0.00  | 0.00  | 0.00      | 0.00  | 0.00  | 0.00      | 0.00  | 0.00  |
| 11             | 1  | 0.00      | 0.00  | -0.01 | -0.01     | -0.01 | 0.02  | 0.00      | 0.00  | 0.00  |
| 12             | 1  | 0.01      | -0.01 | 0.01  | -0.02     | 0.03  | -0.04 | -0.01     | 0.01  | 0.00  |
| 13             | 8  | 0.00      | 0.00  | 0.00  | 0.00      | 0.00  | 0.00  | 0.00      | 0.00  | 0.00  |
| 14             | 1  | -0.01     | 0.00  | 0.02  | -0.01     | 0.00  | 0.01  | 0.00      | 0.00  | 0.00  |
| 15             | 1  | 0.00      | 0.01  | -0.01 | 0.00      | 0.00  | 0.00  | 0.00      | 0.00  | 0.00  |
| 16             | 8  | -0.05     | 0.02  | 0.01  | -0.03     | 0.01  | 0.01  | -0.01     | 0.00  | 0.00  |
| 17             | 1  | -0.04     | -0.03 | -0.01 | -0.02     | -0.02 | -0.01 | -0.01     | -0.01 | 0.00  |

|    |   |       |       |       |       |       |       |       |       |       |
|----|---|-------|-------|-------|-------|-------|-------|-------|-------|-------|
| 18 | 1 | 0.70  | -0.22 | -0.22 | 0.42  | -0.13 | -0.13 | 0.19  | -0.06 | -0.06 |
| 19 | 8 | 0.02  | 0.00  | 0.01  | -0.05 | 0.00  | -0.01 | 0.03  | 0.00  | 0.01  |
| 20 | 1 | -0.33 | -0.02 | -0.08 | 0.76  | 0.04  | 0.20  | -0.44 | -0.02 | -0.11 |
| 21 | 1 | 0.01  | 0.02  | 0.01  | -0.02 | -0.04 | -0.02 | 0.01  | 0.03  | 0.01  |
| 22 | 8 | 0.00  | 0.00  | 0.00  | 0.00  | 0.00  | 0.00  | 0.00  | 0.00  | 0.00  |
| 23 | 1 | 0.00  | -0.03 | -0.01 | 0.00  | 0.03  | 0.02  | 0.00  | -0.01 | -0.01 |
| 24 | 1 | 0.00  | 0.00  | 0.00  | 0.00  | 0.00  | 0.00  | 0.00  | 0.00  | 0.00  |
| 25 | 8 | 0.01  | -0.01 | -0.01 | 0.00  | -0.01 | -0.01 | 0.00  | 0.00  | 0.00  |
| 26 | 1 | -0.11 | 0.15  | 0.23  | -0.06 | 0.08  | 0.12  | -0.02 | 0.03  | 0.04  |
| 27 | 1 | 0.01  | -0.02 | 0.00  | 0.00  | -0.01 | 0.00  | 0.00  | 0.00  | 0.00  |
| 28 | 8 | 0.00  | 0.00  | 0.00  | 0.00  | 0.00  | 0.00  | 0.00  | 0.00  | 0.00  |
| 29 | 1 | -0.01 | -0.01 | 0.01  | 0.00  | 0.00  | 0.00  | 0.00  | 0.00  | 0.00  |
| 30 | 1 | 0.00  | 0.00  | 0.00  | 0.00  | 0.00  | 0.00  | 0.00  | 0.00  | 0.00  |
| 31 | 8 | 0.00  | 0.00  | 0.00  | 0.00  | 0.00  | 0.00  | 0.00  | 0.00  | 0.00  |
| 32 | 1 | -0.02 | 0.01  | 0.02  | 0.04  | -0.02 | -0.04 | -0.02 | 0.01  | 0.02  |
| 33 | 1 | 0.00  | 0.00  | 0.00  | -0.01 | 0.01  | 0.00  | 0.00  | 0.00  | 0.00  |
| 34 | 8 | 0.00  | 0.00  | 0.00  | 0.00  | 0.00  | 0.00  | 0.00  | 0.00  | 0.00  |
| 35 | 1 | 0.06  | -0.01 | 0.07  | 0.03  | -0.01 | 0.04  | 0.01  | 0.00  | 0.01  |
| 36 | 1 | 0.03  | 0.03  | -0.03 | 0.02  | 0.02  | -0.02 | 0.01  | 0.01  | -0.01 |
| 37 | 8 | 0.00  | 0.01  | 0.03  | 0.00  | 0.00  | -0.02 | -0.01 | -0.01 | -0.05 |
| 38 | 1 | -0.05 | -0.09 | -0.38 | 0.03  | 0.07  | 0.30  | 0.09  | 0.21  | 0.81  |
| 39 | 1 | -0.02 | 0.01  | 0.01  | 0.02  | -0.01 | -0.01 | 0.05  | -0.01 | -0.02 |
| 40 | 8 | 0.00  | 0.00  | 0.00  | 0.00  | 0.00  | 0.01  | 0.00  | 0.00  | 0.00  |
| 41 | 1 | 0.03  | 0.02  | 0.04  | -0.06 | -0.04 | -0.09 | 0.02  | 0.02  | 0.03  |
| 42 | 1 | 0.00  | 0.00  | 0.00  | 0.00  | 0.00  | 0.01  | 0.00  | 0.00  | 0.00  |
| 43 | 8 | 0.00  | 0.00  | 0.00  | 0.00  | 0.00  | 0.00  | 0.00  | 0.00  | 0.00  |
| 44 | 1 | 0.01  | 0.02  | 0.00  | 0.00  | 0.00  | 0.00  | 0.00  | 0.01  | 0.00  |
| 45 | 1 | -0.03 | 0.00  | -0.01 | -0.02 | 0.00  | 0.00  | 0.00  | 0.00  | 0.00  |
| 46 | 8 | 0.00  | 0.00  | 0.00  | 0.00  | 0.00  | 0.00  | 0.00  | 0.00  | 0.00  |

|                |    |           |       |       |           |       |       |           |       |       |
|----------------|----|-----------|-------|-------|-----------|-------|-------|-----------|-------|-------|
| 47             | 1  | 0.02      | 0.01  | -0.01 | -0.02     | -0.02 | 0.02  | -0.06     | -0.04 | 0.04  |
| 48             | 1  | 0.03      | -0.07 | -0.01 | 0.00      | 0.00  | 0.00  | -0.02     | 0.05  | 0.01  |
| 49             | 8  | 0.00      | 0.00  | 0.00  | 0.00      | 0.00  | 0.00  | 0.00      | 0.00  | 0.00  |
| 50             | 1  | -0.03     | -0.03 | 0.02  | 0.05      | 0.05  | -0.02 | 0.00      | 0.01  | -0.01 |
| 51             | 1  | 0.00      | 0.00  | -0.02 | 0.00      | 0.01  | 0.06  | 0.00      | -0.01 | -0.06 |
|                |    | 118       |       |       | 119       |       |       | 120       |       |       |
|                |    | A         |       |       | A         |       |       | A         |       |       |
| Frequencies -- |    | 3121.8261 |       |       | 3205.5534 |       |       | 3367.2186 |       |       |
| Red. masses -- |    | 1.0696    |       |       | 1.0682    |       |       | 1.0553    |       |       |
| Frc consts --  |    | 6.1415    |       |       | 6.4671    |       |       | 7.0494    |       |       |
| IR Inten --    |    | 1924.7656 |       |       | 1230.9333 |       |       | 1137.6132 |       |       |
| Raman Activ -- |    | 24.2660   |       |       | 55.7420   |       |       | 299.1255  |       |       |
| Depolar (P) -- |    | 0.4459    |       |       | 0.2029    |       |       | 0.0117    |       |       |
| Depolar (U) -- |    | 0.6168    |       |       | 0.3374    |       |       | 0.0232    |       |       |
| Atom           | AN | X         | Y     | Z     | X         | Y     | Z     | X         | Y     | Z     |
| 1              | 8  | 0.00      | 0.00  | 0.00  | 0.00      | 0.00  | 0.00  | -0.01     | 0.00  | -0.04 |
| 2              | 1  | 0.04      | 0.03  | -0.02 | 0.01      | 0.01  | -0.01 | -0.29     | -0.22 | 0.17  |
| 3              | 1  | -0.03     | -0.01 | -0.02 | -0.06     | -0.02 | -0.06 | 0.42      | 0.19  | 0.43  |
| 4              | 8  | 0.00      | 0.00  | 0.00  | 0.00      | 0.00  | 0.00  | 0.01      | 0.00  | 0.00  |
| 5              | 1  | 0.00      | 0.01  | 0.01  | 0.00      | 0.00  | 0.00  | -0.03     | -0.06 | -0.06 |
| 6              | 1  | -0.01     | 0.00  | 0.00  | 0.00      | 0.00  | 0.00  | -0.05     | 0.06  | 0.02  |
| 7              | 8  | 0.00      | 0.00  | 0.00  | 0.00      | 0.00  | 0.00  | -0.01     | -0.01 | 0.01  |
| 8              | 1  | 0.01      | 0.00  | 0.00  | -0.04     | 0.01  | 0.01  | 0.15      | -0.01 | -0.06 |
| 9              | 1  | 0.00      | 0.01  | 0.00  | 0.01      | -0.03 | -0.01 | -0.04     | 0.12  | 0.01  |
| 10             | 8  | 0.00      | 0.00  | 0.00  | 0.00      | 0.00  | 0.01  | -0.02     | 0.02  | -0.02 |
| 11             | 1  | 0.00      | 0.00  | 0.00  | 0.03      | 0.02  | -0.05 | 0.02      | 0.01  | -0.03 |
| 12             | 1  | 0.00      | 0.00  | 0.00  | -0.03     | 0.03  | -0.03 | 0.22      | -0.27 | 0.29  |
| 13             | 8  | 0.00      | 0.00  | 0.00  | 0.00      | 0.00  | 0.01  | 0.01      | -0.01 | -0.02 |
| 14             | 1  | 0.03      | -0.01 | -0.05 | 0.02      | -0.02 | -0.04 | -0.16     | 0.11  | 0.28  |

|    |   |       |       |       |       |       |       |       |       |       |
|----|---|-------|-------|-------|-------|-------|-------|-------|-------|-------|
| 15 | 1 | 0.00  | -0.01 | 0.01  | 0.00  | 0.04  | -0.04 | 0.01  | 0.02  | -0.03 |
| 16 | 8 | 0.02  | -0.01 | -0.01 | 0.00  | 0.00  | 0.00  | 0.00  | 0.00  | 0.00  |
| 17 | 1 | 0.02  | 0.02  | 0.00  | 0.00  | 0.00  | 0.00  | 0.00  | 0.00  | 0.00  |
| 18 | 1 | -0.31 | 0.10  | 0.10  | -0.01 | 0.00  | 0.00  | -0.04 | 0.01  | 0.01  |
| 19 | 8 | 0.00  | 0.00  | 0.00  | -0.01 | 0.00  | 0.00  | 0.00  | 0.00  | 0.00  |
| 20 | 1 | -0.01 | 0.00  | 0.00  | 0.12  | 0.01  | 0.03  | 0.07  | 0.01  | 0.02  |
| 21 | 1 | 0.00  | 0.00  | 0.00  | 0.00  | -0.01 | 0.00  | 0.00  | 0.00  | 0.00  |
| 22 | 8 | 0.00  | -0.01 | 0.00  | 0.00  | 0.00  | 0.00  | 0.00  | 0.00  | 0.00  |
| 23 | 1 | 0.01  | 0.11  | 0.06  | 0.01  | 0.07  | 0.04  | 0.01  | 0.06  | 0.03  |
| 24 | 1 | -0.01 | 0.00  | 0.00  | 0.00  | 0.00  | 0.00  | 0.00  | 0.00  | 0.00  |
| 25 | 8 | 0.02  | -0.03 | -0.05 | 0.00  | 0.00  | 0.00  | 0.00  | 0.00  | 0.00  |
| 26 | 1 | -0.35 | 0.48  | 0.69  | -0.02 | 0.02  | 0.03  | -0.02 | 0.03  | 0.04  |
| 27 | 1 | 0.02  | -0.06 | 0.01  | 0.00  | 0.00  | 0.00  | 0.00  | 0.00  | 0.00  |
| 28 | 8 | 0.00  | 0.00  | 0.00  | 0.00  | 0.00  | 0.00  | 0.00  | 0.00  | 0.00  |
| 29 | 1 | -0.03 | -0.04 | 0.04  | 0.00  | 0.00  | 0.00  | 0.00  | 0.00  | 0.00  |
| 30 | 1 | 0.02  | 0.00  | 0.02  | -0.01 | 0.00  | -0.01 | -0.05 | 0.02  | -0.07 |
| 31 | 8 | 0.00  | 0.00  | 0.00  | 0.00  | 0.00  | 0.00  | 0.00  | 0.00  | 0.00  |
| 32 | 1 | 0.00  | 0.00  | -0.01 | -0.03 | 0.03  | 0.06  | 0.01  | -0.01 | -0.01 |
| 33 | 1 | -0.01 | 0.01  | 0.00  | 0.05  | -0.05 | 0.05  | -0.02 | 0.02  | 0.00  |
| 34 | 8 | 0.00  | 0.00  | 0.00  | 0.00  | 0.00  | 0.00  | 0.00  | 0.00  | 0.00  |
| 35 | 1 | 0.02  | 0.00  | 0.04  | 0.00  | 0.00  | 0.00  | -0.01 | 0.00  | -0.01 |
| 36 | 1 | -0.02 | -0.02 | 0.02  | 0.00  | 0.00  | 0.00  | 0.01  | 0.02  | -0.02 |
| 37 | 8 | 0.00  | 0.00  | 0.00  | 0.00  | 0.00  | 0.00  | 0.00  | 0.00  | 0.00  |
| 38 | 1 | 0.00  | 0.00  | 0.02  | 0.00  | 0.00  | 0.02  | 0.00  | 0.01  | 0.04  |
| 39 | 1 | 0.00  | 0.00  | 0.00  | 0.00  | 0.00  | 0.00  | 0.00  | 0.00  | 0.00  |
| 40 | 8 | 0.00  | 0.00  | 0.00  | -0.03 | -0.02 | -0.05 | 0.00  | 0.00  | 0.00  |
| 41 | 1 | -0.03 | -0.02 | -0.05 | 0.47  | 0.33  | 0.78  | 0.05  | 0.03  | 0.08  |
| 42 | 1 | 0.00  | 0.00  | 0.00  | 0.02  | 0.03  | -0.07 | 0.00  | 0.00  | -0.01 |
| 43 | 8 | 0.00  | 0.00  | 0.00  | 0.00  | 0.00  | 0.00  | 0.00  | 0.00  | 0.00  |

|                |    |           |       |       |           |       |       |           |       |       |
|----------------|----|-----------|-------|-------|-----------|-------|-------|-----------|-------|-------|
| 44             | 1  | 0.02      | 0.06  | 0.01  | 0.00      | -0.01 | 0.00  | -0.01     | -0.03 | 0.00  |
| 45             | 1  | -0.07     | 0.01  | -0.01 | -0.01     | 0.00  | 0.00  | 0.01      | 0.00  | 0.00  |
| 46             | 8  | 0.00      | 0.00  | 0.00  | 0.00      | 0.00  | 0.00  | 0.00      | 0.00  | 0.00  |
| 47             | 1  | 0.00      | 0.00  | 0.00  | 0.00      | 0.00  | 0.00  | 0.05      | 0.04  | -0.03 |
| 48             | 1  | -0.01     | 0.02  | 0.00  | 0.00      | 0.00  | 0.00  | -0.01     | 0.02  | 0.00  |
| 49             | 8  | 0.00      | 0.00  | 0.00  | 0.00      | 0.00  | 0.00  | 0.00      | 0.00  | 0.01  |
| 50             | 1  | 0.00      | 0.00  | 0.00  | 0.01      | 0.01  | 0.00  | 0.01      | 0.02  | -0.01 |
| 51             | 1  | 0.00      | 0.00  | 0.00  | 0.00      | 0.00  | 0.00  | 0.01      | -0.01 | -0.07 |
|                |    | 121       |       |       | 122       |       |       | 123       |       |       |
|                |    | A         |       |       | A         |       |       | A         |       |       |
| Frequencies -- |    | 3397.9949 |       |       | 3434.1156 |       |       | 3519.6747 |       |       |
| Red. masses -- |    | 1.0669    |       |       | 1.0816    |       |       | 1.0544    |       |       |
| Frc consts --  |    | 7.2580    |       |       | 7.5151    |       |       | 7.6957    |       |       |
| IR Inten --    |    | 1020.8603 |       |       | 1559.1860 |       |       | 6.8304    |       |       |
| Raman Activ -- |    | 36.3298   |       |       | 43.2355   |       |       | 38.0871   |       |       |
| Depolar (P) -- |    | 0.7010    |       |       | 0.4153    |       |       | 0.3717    |       |       |
| Depolar (U) -- |    | 0.8242    |       |       | 0.5869    |       |       | 0.5419    |       |       |
| Atom           | AN | X         | Y     | Z     | X         | Y     | Z     | X         | Y     | Z     |
| 1              | 8  | 0.00      | 0.00  | 0.00  | -0.05     | -0.03 | -0.01 | -0.01     | -0.01 | 0.02  |
| 2              | 1  | -0.01     | 0.00  | 0.00  | 0.47      | 0.36  | -0.31 | 0.30      | 0.23  | -0.17 |
| 3              | 1  | 0.05      | 0.03  | 0.06  | 0.36      | 0.16  | 0.39  | -0.20     | -0.09 | -0.19 |
| 4              | 8  | 0.00      | 0.00  | 0.00  | -0.01     | 0.00  | -0.01 | -0.01     | 0.00  | -0.01 |
| 5              | 1  | 0.00      | 0.01  | 0.00  | 0.08      | 0.14  | 0.15  | 0.07      | 0.12  | 0.13  |
| 6              | 1  | 0.01      | -0.01 | 0.00  | 0.13      | -0.16 | -0.04 | 0.10      | -0.12 | -0.03 |
| 7              | 8  | 0.00      | 0.00  | 0.00  | -0.01     | -0.01 | 0.01  | 0.01      | 0.01  | 0.00  |
| 8              | 1  | 0.03      | 0.00  | -0.01 | 0.21      | -0.01 | -0.08 | -0.17     | 0.01  | 0.06  |
| 9              | 1  | -0.01     | 0.01  | 0.00  | -0.05     | 0.16  | 0.01  | 0.03      | -0.11 | -0.01 |
| 10             | 8  | 0.02      | -0.02 | 0.03  | 0.00      | 0.00  | 0.00  | -0.02     | 0.02  | -0.01 |
| 11             | 1  | -0.02     | -0.01 | 0.04  | -0.01     | -0.01 | 0.02  | 0.06      | 0.02  | -0.07 |

|    |   |       |       |       |       |       |       |       |       |       |
|----|---|-------|-------|-------|-------|-------|-------|-------|-------|-------|
| 12 | 1 | -0.32 | 0.39  | -0.43 | -0.04 | 0.06  | -0.06 | 0.23  | -0.28 | 0.30  |
| 13 | 8 | 0.02  | -0.02 | -0.04 | -0.01 | 0.00  | 0.01  | 0.01  | -0.01 | -0.02 |
| 14 | 1 | -0.33 | 0.22  | 0.58  | 0.08  | -0.05 | -0.14 | -0.20 | 0.13  | 0.35  |
| 15 | 1 | 0.01  | 0.03  | -0.04 | 0.00  | -0.01 | 0.01  | 0.01  | 0.10  | -0.09 |
| 16 | 8 | 0.00  | 0.00  | 0.00  | 0.00  | 0.00  | 0.00  | 0.00  | 0.00  | 0.00  |
| 17 | 1 | 0.00  | 0.00  | 0.00  | 0.00  | 0.00  | 0.00  | 0.00  | 0.00  | 0.00  |
| 18 | 1 | -0.04 | 0.01  | 0.01  | 0.05  | -0.02 | -0.02 | 0.02  | 0.00  | 0.00  |
| 19 | 8 | 0.00  | 0.00  | 0.00  | 0.00  | 0.00  | 0.00  | 0.00  | 0.00  | 0.00  |
| 20 | 1 | -0.03 | 0.00  | -0.01 | 0.05  | 0.00  | 0.01  | 0.01  | 0.00  | 0.00  |
| 21 | 1 | 0.00  | 0.00  | 0.00  | 0.00  | 0.00  | 0.00  | 0.00  | 0.00  | 0.00  |
| 22 | 8 | 0.00  | 0.00  | 0.00  | 0.00  | 0.00  | 0.00  | 0.00  | 0.00  | 0.00  |
| 23 | 1 | 0.01  | 0.04  | 0.02  | 0.00  | 0.03  | 0.02  | 0.00  | 0.03  | 0.01  |
| 24 | 1 | 0.00  | 0.00  | 0.00  | 0.00  | 0.00  | 0.00  | -0.01 | 0.00  | 0.00  |
| 25 | 8 | 0.00  | 0.00  | 0.00  | 0.00  | 0.00  | 0.00  | 0.00  | 0.00  | 0.00  |
| 26 | 1 | -0.01 | 0.02  | 0.02  | 0.01  | -0.01 | -0.01 | -0.01 | 0.01  | 0.01  |
| 27 | 1 | 0.00  | 0.00  | 0.00  | 0.00  | 0.00  | 0.00  | 0.00  | 0.00  | 0.00  |
| 28 | 8 | 0.01  | 0.00  | 0.01  | 0.00  | 0.00  | 0.00  | 0.02  | -0.01 | 0.02  |
| 29 | 1 | 0.01  | 0.00  | 0.00  | -0.01 | -0.01 | 0.01  | -0.01 | -0.02 | 0.03  |
| 30 | 1 | -0.09 | 0.04  | -0.12 | 0.02  | -0.01 | 0.02  | -0.24 | 0.10  | -0.31 |
| 31 | 8 | 0.00  | 0.00  | 0.00  | 0.00  | 0.00  | 0.00  | 0.00  | 0.00  | 0.00  |
| 32 | 1 | 0.00  | 0.00  | -0.01 | 0.01  | -0.01 | -0.01 | -0.02 | 0.01  | 0.02  |
| 33 | 1 | 0.00  | 0.00  | 0.00  | -0.02 | 0.03  | -0.01 | 0.05  | -0.05 | 0.03  |
| 34 | 8 | 0.00  | 0.00  | 0.00  | 0.00  | 0.00  | 0.00  | 0.00  | 0.00  | 0.00  |
| 35 | 1 | 0.00  | 0.00  | 0.00  | 0.00  | 0.00  | -0.01 | 0.02  | 0.00  | 0.03  |
| 36 | 1 | 0.02  | 0.03  | -0.04 | -0.01 | -0.02 | 0.02  | 0.01  | 0.02  | -0.01 |
| 37 | 8 | 0.00  | 0.00  | 0.00  | 0.00  | 0.00  | 0.00  | 0.00  | 0.00  | 0.00  |
| 38 | 1 | 0.00  | 0.00  | -0.02 | 0.00  | 0.00  | -0.03 | 0.00  | 0.00  | 0.01  |
| 39 | 1 | 0.00  | 0.00  | 0.00  | 0.00  | 0.00  | 0.00  | 0.00  | 0.00  | 0.00  |
| 40 | 8 | 0.00  | 0.00  | 0.00  | 0.00  | 0.00  | 0.00  | 0.00  | 0.00  | 0.00  |

|                |    |           |       |       |           |       |       |           |       |       |
|----------------|----|-----------|-------|-------|-----------|-------|-------|-----------|-------|-------|
| 41             | 1  | 0.00      | 0.00  | 0.00  | 0.02      | 0.01  | 0.03  | -0.01     | -0.01 | -0.02 |
| 42             | 1  | 0.00      | 0.00  | 0.00  | 0.00      | 0.00  | 0.00  | 0.00      | 0.00  | 0.00  |
| 43             | 8  | 0.00      | 0.00  | 0.00  | 0.00      | 0.00  | 0.00  | 0.00      | 0.00  | 0.00  |
| 44             | 1  | 0.00      | 0.00  | 0.00  | -0.02     | -0.04 | -0.01 | 0.00      | 0.00  | 0.00  |
| 45             | 1  | 0.01      | 0.00  | 0.00  | -0.06     | 0.01  | -0.01 | -0.01     | 0.00  | -0.01 |
| 46             | 8  | 0.00      | 0.00  | 0.00  | 0.00      | 0.00  | 0.00  | -0.01     | 0.00  | 0.00  |
| 47             | 1  | -0.06     | -0.05 | 0.04  | -0.03     | -0.02 | 0.02  | 0.08      | 0.06  | -0.04 |
| 48             | 1  | 0.00      | -0.01 | 0.00  | 0.01      | -0.03 | 0.00  | 0.01      | -0.05 | 0.00  |
| 49             | 8  | 0.00      | 0.00  | -0.01 | 0.00      | 0.00  | 0.00  | 0.00      | 0.00  | 0.01  |
| 50             | 1  | -0.01     | -0.01 | 0.00  | -0.02     | -0.02 | 0.02  | -0.02     | -0.03 | 0.02  |
| 51             | 1  | -0.01     | 0.01  | 0.09  | 0.00      | 0.01  | 0.02  | 0.01      | -0.02 | -0.12 |
|                |    | 124       |       |       | 125       |       |       | 126       |       |       |
|                |    | A         |       |       | A         |       |       | A         |       |       |
| Frequencies -- |    | 3549.0138 |       |       | 3555.4327 |       |       | 3569.6101 |       |       |
| Red. masses -- |    | 1.0581    |       |       | 1.0591    |       |       | 1.0507    |       |       |
| Frc consts --  |    | 7.8520    |       |       | 7.8881    |       |       | 7.8877    |       |       |
| IR Inten --    |    | 439.4645  |       |       | 547.4740  |       |       | 489.0897  |       |       |
| Raman Activ -- |    | 65.8795   |       |       | 60.2187   |       |       | 91.5172   |       |       |
| Depolar (P) -- |    | 0.2306    |       |       | 0.6435    |       |       | 0.2056    |       |       |
| Depolar (U) -- |    | 0.3748    |       |       | 0.7831    |       |       | 0.3410    |       |       |
| Atom           | AN | X         | Y     | Z     | X         | Y     | Z     | X         | Y     | Z     |
| 1              | 8  | 0.02      | 0.01  | 0.01  | 0.00      | 0.00  | 0.01  | 0.02      | 0.01  | -0.01 |
| 2              | 1  | -0.04     | -0.03 | 0.03  | 0.07      | 0.05  | -0.04 | -0.27     | -0.20 | 0.17  |
| 3              | 1  | -0.22     | -0.10 | -0.23 | -0.12     | -0.06 | -0.12 | 0.03      | 0.01  | 0.02  |
| 4              | 8  | 0.00      | 0.00  | 0.00  | -0.01     | 0.00  | 0.00  | -0.03     | 0.00  | -0.02 |
| 5              | 1  | 0.02      | 0.03  | 0.03  | 0.04      | 0.07  | 0.08  | 0.25      | 0.41  | 0.44  |
| 6              | 1  | 0.02      | -0.02 | -0.01 | 0.07      | -0.08 | -0.02 | 0.32      | -0.39 | -0.08 |
| 7              | 8  | -0.04     | -0.01 | 0.02  | -0.01     | 0.00  | 0.00  | 0.01      | 0.00  | 0.00  |
| 8              | 1  | 0.75      | -0.03 | -0.28 | 0.14      | -0.01 | -0.05 | -0.09     | 0.00  | 0.03  |



|    |   |       |       |       |       |       |       |       |       |       |
|----|---|-------|-------|-------|-------|-------|-------|-------|-------|-------|
| 9  | 1 | -0.09 | 0.25  | 0.02  | -0.02 | 0.08  | 0.01  | 0.00  | 0.00  | 0.00  |
| 10 | 8 | 0.00  | 0.00  | 0.00  | -0.01 | 0.00  | 0.00  | 0.00  | 0.00  | 0.00  |
| 11 | 1 | 0.00  | 0.00  | 0.01  | 0.05  | 0.02  | -0.06 | -0.01 | -0.01 | 0.02  |
| 12 | 1 | 0.02  | -0.02 | 0.02  | 0.07  | -0.09 | 0.10  | -0.03 | 0.04  | -0.04 |
| 13 | 8 | 0.00  | 0.00  | 0.00  | 0.01  | 0.00  | -0.02 | 0.00  | 0.00  | 0.00  |
| 14 | 1 | 0.01  | -0.01 | -0.03 | -0.17 | 0.11  | 0.29  | 0.04  | -0.03 | -0.08 |
| 15 | 1 | 0.00  | 0.02  | -0.02 | 0.00  | -0.03 | 0.02  | 0.00  | -0.01 | 0.01  |
| 16 | 8 | 0.00  | 0.00  | 0.00  | 0.00  | 0.00  | 0.00  | 0.00  | 0.00  | 0.00  |
| 17 | 1 | 0.00  | 0.00  | 0.00  | 0.00  | 0.00  | 0.00  | 0.00  | 0.01  | 0.00  |
| 18 | 1 | 0.01  | 0.00  | 0.00  | -0.01 | 0.00  | 0.00  | 0.04  | -0.01 | -0.01 |
| 19 | 8 | 0.00  | 0.00  | 0.00  | 0.00  | 0.00  | 0.00  | 0.00  | 0.00  | 0.00  |
| 20 | 1 | 0.01  | 0.00  | 0.00  | 0.02  | 0.00  | 0.01  | 0.01  | 0.00  | 0.00  |
| 21 | 1 | 0.00  | 0.00  | 0.00  | 0.00  | 0.00  | 0.00  | 0.00  | 0.00  | 0.00  |
| 22 | 8 | 0.00  | 0.00  | 0.00  | 0.00  | 0.00  | 0.00  | 0.00  | 0.00  | 0.00  |
| 23 | 1 | 0.01  | 0.06  | 0.03  | -0.01 | -0.06 | -0.03 | 0.00  | 0.00  | 0.00  |
| 24 | 1 | 0.01  | 0.00  | 0.00  | 0.01  | 0.00  | 0.00  | 0.00  | 0.00  | 0.00  |
| 25 | 8 | 0.00  | 0.00  | 0.00  | 0.00  | 0.00  | 0.00  | 0.00  | 0.00  | 0.00  |
| 26 | 1 | 0.02  | -0.02 | -0.03 | 0.00  | 0.00  | 0.00  | -0.02 | 0.03  | 0.04  |
| 27 | 1 | 0.00  | 0.00  | 0.00  | 0.00  | 0.00  | 0.00  | 0.00  | -0.01 | 0.00  |
| 28 | 8 | 0.01  | 0.00  | 0.01  | -0.03 | 0.01  | -0.03 | 0.00  | 0.00  | 0.00  |
| 29 | 1 | -0.03 | -0.04 | 0.04  | 0.06  | 0.10  | -0.10 | 0.00  | 0.00  | 0.00  |
| 30 | 1 | -0.15 | 0.06  | -0.19 | 0.48  | -0.20 | 0.62  | -0.03 | 0.01  | -0.04 |
| 31 | 8 | 0.01  | -0.01 | 0.01  | 0.00  | 0.00  | 0.00  | 0.00  | 0.00  | 0.00  |
| 32 | 1 | 0.02  | -0.01 | -0.02 | 0.01  | -0.01 | -0.01 | 0.01  | 0.00  | -0.01 |
| 33 | 1 | -0.14 | 0.15  | -0.09 | -0.05 | 0.06  | -0.03 | 0.01  | -0.01 | 0.01  |
| 34 | 8 | 0.00  | 0.00  | 0.00  | 0.00  | -0.01 | 0.01  | 0.00  | 0.00  | 0.00  |
| 35 | 1 | 0.01  | 0.00  | 0.02  | -0.03 | 0.00  | -0.04 | -0.03 | 0.01  | -0.05 |
| 36 | 1 | -0.02 | -0.02 | 0.02  | 0.07  | 0.10  | -0.09 | -0.01 | -0.02 | 0.02  |
| 37 | 8 | 0.00  | 0.00  | 0.00  | 0.00  | 0.00  | 0.00  | 0.00  | 0.00  | 0.00  |

|                |    |           |       |       |           |       |       |           |       |       |
|----------------|----|-----------|-------|-------|-----------|-------|-------|-----------|-------|-------|
| 38             | 1  | 0.00      | 0.00  | 0.00  | 0.00      | 0.00  | 0.01  | 0.00      | 0.00  | 0.00  |
| 39             | 1  | 0.00      | 0.00  | 0.00  | 0.00      | 0.00  | 0.00  | 0.01      | 0.00  | 0.00  |
| 40             | 8  | 0.00      | 0.00  | 0.00  | 0.00      | 0.00  | 0.00  | 0.00      | 0.00  | 0.00  |
| 41             | 1  | 0.01      | 0.01  | 0.02  | 0.02      | 0.01  | 0.03  | 0.00      | 0.00  | 0.00  |
| 42             | 1  | 0.00      | 0.00  | 0.00  | 0.00      | 0.00  | 0.00  | 0.00      | 0.00  | 0.00  |
| 43             | 8  | -0.01     | -0.01 | 0.00  | 0.00      | 0.00  | 0.00  | -0.02     | 0.00  | 0.00  |
| 44             | 1  | 0.08      | 0.18  | 0.01  | 0.02      | 0.05  | 0.00  | -0.02     | -0.03 | 0.00  |
| 45             | 1  | 0.04      | -0.01 | 0.01  | 0.01      | 0.00  | 0.00  | 0.30      | -0.03 | 0.06  |
| 46             | 8  | 0.00      | 0.00  | 0.00  | 0.00      | 0.00  | 0.00  | -0.01     | 0.01  | 0.00  |
| 47             | 1  | 0.00      | 0.00  | 0.00  | 0.06      | 0.05  | -0.03 | 0.07      | 0.06  | -0.04 |
| 48             | 1  | 0.00      | -0.01 | 0.00  | 0.01      | -0.05 | 0.00  | 0.04      | -0.15 | 0.00  |
| 49             | 8  | 0.00      | 0.00  | 0.00  | 0.00      | 0.00  | 0.01  | 0.00      | 0.00  | -0.01 |
| 50             | 1  | 0.00      | 0.00  | 0.00  | -0.02     | -0.02 | 0.02  | -0.03     | -0.03 | 0.02  |
| 51             | 1  | 0.00      | 0.00  | 0.02  | 0.01      | -0.02 | -0.10 | -0.01     | 0.02  | 0.07  |
|                |    | 127       |       |       | 128       |       |       | 129       |       |       |
|                |    | A         |       |       | A         |       |       | A         |       |       |
| Frequencies -- |    | 3585.3709 |       |       | 3597.9025 |       |       | 3602.4111 |       |       |
| Red. masses -- |    | 1.0549    |       |       | 1.0619    |       |       | 1.0785    |       |       |
| Frc consts --  |    | 7.9895    |       |       | 8.0988    |       |       | 8.2460    |       |       |
| IR Inten --    |    | 258.7925  |       |       | 327.4929  |       |       | 256.0387  |       |       |
| Raman Activ -- |    | 49.2275   |       |       | 63.1669   |       |       | 109.2527  |       |       |
| Depolar (P) -- |    | 0.4663    |       |       | 0.5499    |       |       | 0.4167    |       |       |
| Depolar (U) -- |    | 0.6360    |       |       | 0.7096    |       |       | 0.5883    |       |       |
| Atom           | AN | X         | Y     | Z     | X         | Y     | Z     | X         | Y     | Z     |
| 1              | 8  | 0.00      | 0.00  | 0.00  | 0.00      | 0.00  | 0.00  | 0.00      | 0.00  | 0.00  |
| 2              | 1  | -0.05     | -0.03 | 0.03  | -0.02     | -0.01 | 0.01  | 0.00      | 0.00  | 0.00  |
| 3              | 1  | -0.01     | -0.01 | -0.02 | 0.00      | 0.00  | 0.00  | -0.06     | -0.03 | -0.06 |
| 4              | 8  | -0.01     | 0.00  | 0.00  | 0.00      | 0.01  | 0.00  | 0.00      | 0.00  | 0.00  |
| 5              | 1  | 0.03      | 0.05  | 0.06  | -0.02     | -0.03 | -0.04 | -0.02     | -0.03 | -0.03 |

|    |   |       |       |       |       |       |       |       |       |       |
|----|---|-------|-------|-------|-------|-------|-------|-------|-------|-------|
| 6  | 1 | 0.06  | -0.08 | -0.02 | 0.08  | -0.09 | -0.02 | -0.01 | 0.02  | 0.00  |
| 7  | 8 | 0.00  | 0.00  | 0.00  | 0.01  | -0.01 | 0.00  | 0.03  | -0.05 | -0.01 |
| 8  | 1 | -0.03 | 0.00  | 0.01  | -0.07 | 0.00  | 0.02  | -0.26 | -0.01 | 0.09  |
| 9  | 1 | -0.02 | 0.07  | 0.01  | -0.05 | 0.18  | 0.01  | -0.23 | 0.79  | 0.07  |
| 10 | 8 | 0.00  | 0.00  | 0.00  | 0.00  | 0.00  | 0.00  | 0.00  | 0.00  | 0.00  |
| 11 | 1 | -0.02 | -0.01 | 0.02  | -0.02 | -0.01 | 0.02  | 0.02  | 0.01  | -0.02 |
| 12 | 1 | 0.01  | -0.02 | 0.02  | 0.00  | 0.00  | 0.00  | -0.01 | 0.02  | -0.02 |
| 13 | 8 | 0.00  | 0.00  | 0.00  | 0.00  | 0.00  | 0.00  | 0.00  | 0.00  | 0.00  |
| 14 | 1 | 0.00  | 0.00  | -0.01 | 0.03  | -0.01 | -0.04 | 0.00  | 0.00  | 0.00  |
| 15 | 1 | 0.00  | 0.01  | -0.01 | 0.00  | 0.02  | -0.01 | 0.00  | -0.01 | 0.01  |
| 16 | 8 | 0.00  | 0.00  | 0.00  | 0.00  | 0.00  | 0.00  | 0.00  | 0.00  | 0.00  |
| 17 | 1 | 0.00  | 0.00  | 0.00  | 0.01  | 0.01  | 0.00  | 0.00  | 0.00  | 0.00  |
| 18 | 1 | 0.00  | 0.00  | 0.00  | -0.08 | 0.02  | 0.02  | 0.01  | 0.00  | 0.00  |
| 19 | 8 | 0.00  | 0.00  | 0.00  | 0.00  | 0.00  | 0.00  | 0.00  | 0.00  | 0.00  |
| 20 | 1 | 0.06  | 0.01  | 0.02  | 0.01  | 0.00  | 0.00  | 0.05  | 0.01  | 0.01  |
| 21 | 1 | 0.00  | -0.01 | 0.00  | 0.00  | 0.00  | 0.00  | 0.00  | 0.01  | 0.00  |
| 22 | 8 | 0.00  | 0.00  | 0.00  | 0.00  | 0.00  | 0.00  | 0.00  | 0.00  | 0.00  |
| 23 | 1 | 0.00  | -0.01 | 0.00  | -0.01 | -0.04 | -0.02 | 0.00  | 0.00  | 0.00  |
| 24 | 1 | 0.00  | 0.00  | 0.00  | 0.00  | 0.00  | 0.00  | 0.00  | 0.00  | 0.00  |
| 25 | 8 | 0.00  | 0.00  | 0.00  | 0.00  | 0.00  | 0.00  | 0.00  | 0.00  | 0.00  |
| 26 | 1 | 0.00  | 0.00  | 0.01  | 0.01  | -0.02 | -0.02 | 0.01  | -0.01 | -0.02 |
| 27 | 1 | 0.00  | 0.00  | 0.00  | 0.00  | 0.00  | 0.00  | 0.00  | 0.00  | 0.00  |
| 28 | 8 | 0.00  | 0.00  | 0.00  | -0.01 | -0.02 | 0.02  | 0.00  | 0.00  | 0.00  |
| 29 | 1 | 0.01  | 0.02  | -0.02 | 0.22  | 0.29  | -0.26 | -0.06 | -0.08 | 0.07  |
| 30 | 1 | 0.00  | 0.00  | 0.00  | -0.04 | 0.01  | -0.03 | -0.01 | 0.01  | -0.02 |
| 31 | 8 | 0.00  | 0.00  | 0.00  | 0.00  | 0.00  | 0.00  | -0.02 | 0.02  | 0.00  |
| 32 | 1 | 0.00  | 0.00  | 0.00  | 0.04  | -0.02 | -0.05 | 0.15  | -0.08 | -0.18 |
| 33 | 1 | 0.01  | -0.01 | 0.00  | 0.00  | 0.00  | 0.00  | 0.17  | -0.18 | 0.11  |
| 34 | 8 | 0.00  | 0.00  | 0.00  | -0.03 | 0.00  | -0.04 | 0.01  | 0.00  | 0.01  |

|                |    |           |       |       |           |       |       |           |       |       |
|----------------|----|-----------|-------|-------|-----------|-------|-------|-----------|-------|-------|
| 35             | 1  | 0.02      | -0.01 | 0.03  | 0.45      | -0.11 | 0.67  | -0.09     | 0.02  | -0.13 |
| 36             | 1  | 0.01      | 0.01  | -0.01 | 0.07      | 0.13  | -0.12 | -0.02     | -0.04 | 0.03  |
| 37             | 8  | 0.00      | 0.00  | 0.01  | 0.00      | 0.00  | 0.00  | 0.00      | 0.00  | 0.00  |
| 38             | 1  | 0.00      | -0.03 | -0.10 | 0.00      | 0.00  | 0.00  | 0.00      | 0.00  | 0.01  |
| 39             | 1  | -0.01     | 0.00  | 0.01  | 0.00      | 0.00  | 0.00  | 0.00      | 0.00  | 0.00  |
| 40             | 8  | 0.00      | 0.00  | 0.00  | 0.00      | 0.00  | 0.00  | 0.00      | 0.00  | 0.00  |
| 41             | 1  | 0.00      | 0.00  | 0.00  | 0.01      | 0.00  | 0.01  | 0.00      | 0.00  | 0.00  |
| 42             | 1  | 0.00      | 0.00  | 0.00  | 0.00      | 0.00  | 0.00  | 0.00      | 0.00  | 0.00  |
| 43             | 8  | 0.00      | 0.00  | 0.00  | 0.00      | 0.00  | 0.00  | 0.00      | -0.01 | 0.00  |
| 44             | 1  | 0.00      | 0.01  | 0.00  | 0.01      | 0.02  | 0.00  | 0.06      | 0.14  | 0.01  |
| 45             | 1  | 0.07      | -0.01 | 0.01  | 0.00      | 0.00  | 0.00  | -0.03     | 0.00  | -0.01 |
| 46             | 8  | 0.04      | 0.01  | -0.02 | 0.00      | 0.00  | 0.00  | 0.00      | 0.00  | 0.00  |
| 47             | 1  | -0.53     | -0.43 | 0.30  | 0.03      | 0.02  | -0.01 | 0.07      | 0.05  | -0.04 |
| 48             | 1  | -0.07     | 0.27  | 0.00  | 0.00      | -0.02 | 0.00  | 0.01      | -0.04 | 0.00  |
| 49             | 8  | 0.00      | 0.01  | 0.03  | 0.00      | 0.00  | -0.01 | 0.00      | 0.00  | 0.00  |
| 50             | 1  | -0.07     | -0.07 | 0.05  | -0.01     | -0.01 | 0.01  | -0.02     | -0.02 | 0.01  |
| 51             | 1  | 0.06      | -0.11 | -0.53 | -0.01     | 0.02  | 0.08  | 0.00      | -0.01 | -0.03 |
|                |    | 130       |       |       | 131       |       |       | 132       |       |       |
|                |    | A         |       |       | A         |       |       | A         |       |       |
| Frequencies -- |    | 3609.9201 |       |       | 3617.5192 |       |       | 3622.6701 |       |       |
| Red. masses -- |    | 1.0762    |       |       | 1.0594    |       |       | 1.0496    |       |       |
| Frc consts --  |    | 8.2634    |       |       | 8.1681    |       |       | 8.1155    |       |       |
| IR Inten --    |    | 120.8466  |       |       | 618.0353  |       |       | 497.0492  |       |       |
| Raman Activ -- |    | 117.1876  |       |       | 188.2138  |       |       | 61.8081   |       |       |
| Depolar (P) -- |    | 0.2035    |       |       | 0.1062    |       |       | 0.4392    |       |       |
| Depolar (U) -- |    | 0.3381    |       |       | 0.1920    |       |       | 0.6104    |       |       |
| Atom           | AN | X         | Y     | Z     | X         | Y     | Z     | X         | Y     | Z     |
| 1              | 8  | 0.00      | 0.00  | 0.00  | 0.00      | 0.00  | 0.00  | 0.00      | 0.00  | 0.00  |
| 2              | 1  | 0.00      | 0.00  | 0.00  | 0.03      | 0.03  | -0.02 | 0.00      | 0.00  | 0.00  |

|    |   |       |       |       |       |       |       |       |       |       |
|----|---|-------|-------|-------|-------|-------|-------|-------|-------|-------|
| 3  | 1 | 0.02  | 0.01  | 0.02  | -0.02 | -0.01 | -0.02 | 0.02  | 0.01  | 0.01  |
| 4  | 8 | 0.01  | -0.05 | -0.03 | 0.01  | -0.03 | -0.02 | 0.00  | 0.01  | 0.01  |
| 5  | 1 | 0.18  | 0.26  | 0.30  | 0.13  | 0.20  | 0.23  | -0.06 | -0.10 | -0.11 |
| 6  | 1 | -0.39 | 0.45  | 0.09  | -0.21 | 0.25  | 0.05  | 0.07  | -0.08 | -0.02 |
| 7  | 8 | 0.00  | 0.00  | 0.00  | 0.01  | 0.00  | 0.00  | 0.01  | 0.00  | 0.00  |
| 8  | 1 | 0.03  | 0.00  | -0.01 | -0.13 | 0.00  | 0.05  | -0.17 | 0.01  | 0.06  |
| 9  | 1 | 0.00  | 0.00  | 0.00  | -0.01 | 0.05  | 0.00  | 0.02  | -0.05 | 0.00  |
| 10 | 8 | 0.00  | -0.01 | 0.01  | 0.00  | 0.01  | -0.01 | 0.00  | 0.00  | 0.01  |
| 11 | 1 | 0.06  | 0.02  | -0.07 | -0.09 | -0.03 | 0.10  | 0.06  | 0.02  | -0.06 |
| 12 | 1 | -0.06 | 0.08  | -0.08 | 0.08  | -0.10 | 0.11  | -0.04 | 0.05  | -0.06 |
| 13 | 8 | 0.00  | 0.00  | 0.00  | 0.00  | 0.00  | 0.00  | 0.00  | 0.00  | 0.00  |
| 14 | 1 | 0.02  | -0.01 | -0.03 | -0.03 | 0.02  | 0.05  | 0.01  | 0.00  | -0.02 |
| 15 | 1 | -0.01 | -0.04 | 0.04  | 0.01  | 0.05  | -0.04 | -0.01 | -0.04 | 0.04  |
| 16 | 8 | 0.00  | 0.00  | 0.00  | 0.00  | 0.00  | 0.00  | 0.00  | 0.00  | 0.00  |
| 17 | 1 | 0.00  | 0.00  | 0.00  | 0.00  | 0.01  | 0.00  | 0.00  | -0.01 | 0.00  |
| 18 | 1 | 0.01  | 0.00  | 0.00  | 0.02  | -0.01 | -0.01 | -0.01 | 0.00  | 0.00  |
| 19 | 8 | 0.00  | 0.00  | 0.00  | 0.00  | 0.00  | 0.00  | 0.00  | 0.00  | 0.00  |
| 20 | 1 | 0.03  | 0.00  | 0.01  | -0.08 | -0.01 | -0.02 | 0.01  | 0.00  | 0.00  |
| 21 | 1 | 0.00  | 0.00  | 0.00  | 0.00  | 0.01  | 0.00  | 0.00  | -0.01 | -0.01 |
| 22 | 8 | 0.00  | 0.00  | 0.00  | 0.00  | 0.00  | 0.00  | 0.00  | 0.00  | 0.00  |
| 23 | 1 | 0.00  | 0.00  | 0.00  | -0.01 | -0.02 | -0.01 | -0.01 | -0.04 | -0.02 |
| 24 | 1 | 0.00  | 0.00  | 0.00  | -0.01 | 0.00  | 0.00  | -0.02 | 0.00  | 0.00  |
| 25 | 8 | 0.00  | 0.00  | 0.00  | 0.00  | 0.00  | 0.00  | 0.00  | 0.00  | 0.00  |
| 26 | 1 | 0.01  | -0.01 | -0.01 | 0.00  | 0.01  | 0.01  | 0.00  | 0.00  | 0.00  |
| 27 | 1 | 0.00  | 0.00  | 0.00  | 0.00  | 0.00  | 0.00  | 0.00  | 0.00  | 0.00  |
| 28 | 8 | 0.00  | 0.00  | 0.00  | 0.00  | 0.00  | 0.00  | 0.00  | 0.00  | 0.00  |
| 29 | 1 | 0.03  | 0.03  | -0.03 | 0.02  | 0.02  | -0.02 | -0.02 | -0.02 | 0.02  |
| 30 | 1 | -0.02 | 0.01  | -0.02 | 0.01  | -0.01 | 0.02  | -0.04 | 0.02  | -0.06 |
| 31 | 8 | 0.00  | 0.00  | 0.00  | 0.00  | -0.01 | 0.02  | 0.01  | -0.02 | 0.04  |

|    |   |       |       |       |       |       |       |       |       |       |
|----|---|-------|-------|-------|-------|-------|-------|-------|-------|-------|
| 32 | 1 | -0.04 | 0.02  | 0.04  | 0.22  | -0.12 | -0.25 | 0.31  | -0.17 | -0.34 |
| 33 | 1 | 0.03  | -0.04 | 0.02  | -0.21 | 0.22  | -0.12 | -0.42 | 0.46  | -0.25 |
| 34 | 8 | 0.00  | 0.00  | -0.01 | 0.00  | 0.00  | 0.00  | 0.00  | 0.00  | 0.00  |
| 35 | 1 | 0.08  | -0.02 | 0.11  | -0.01 | 0.00  | -0.02 | -0.02 | 0.01  | -0.02 |
| 36 | 1 | -0.01 | -0.01 | 0.01  | 0.01  | 0.02  | -0.01 | -0.03 | -0.05 | 0.04  |
| 37 | 8 | 0.00  | 0.00  | -0.01 | 0.00  | 0.00  | 0.00  | 0.00  | 0.00  | 0.00  |
| 38 | 1 | 0.00  | 0.02  | 0.09  | 0.00  | 0.00  | 0.00  | 0.00  | 0.00  | 0.01  |
| 39 | 1 | 0.00  | 0.00  | 0.00  | -0.01 | 0.00  | 0.00  | 0.00  | 0.00  | 0.00  |
| 40 | 8 | 0.00  | 0.00  | 0.00  | 0.00  | 0.00  | 0.00  | 0.00  | 0.00  | 0.00  |
| 41 | 1 | -0.01 | -0.01 | -0.02 | 0.04  | 0.02  | 0.07  | 0.04  | 0.02  | 0.07  |
| 42 | 1 | 0.00  | 0.00  | 0.00  | 0.00  | 0.00  | -0.01 | 0.01  | 0.01  | -0.01 |
| 43 | 8 | 0.00  | 0.00  | 0.00  | 0.00  | 0.00  | 0.00  | 0.00  | 0.00  | 0.00  |
| 44 | 1 | 0.01  | 0.01  | 0.00  | -0.01 | -0.01 | 0.00  | -0.02 | -0.04 | 0.00  |
| 45 | 1 | -0.06 | 0.01  | -0.01 | 0.00  | 0.00  | 0.00  | 0.01  | 0.00  | 0.00  |
| 46 | 8 | -0.01 | 0.02  | 0.00  | 0.02  | 0.01  | -0.01 | -0.01 | 0.00  | 0.01  |
| 47 | 1 | 0.09  | 0.09  | -0.05 | -0.25 | -0.20 | 0.14  | 0.15  | 0.12  | -0.08 |
| 48 | 1 | 0.11  | -0.36 | -0.01 | -0.01 | 0.06  | 0.00  | 0.02  | -0.08 | 0.00  |
| 49 | 8 | 0.00  | 0.00  | 0.03  | -0.01 | -0.02 | -0.02 | 0.01  | 0.01  | 0.01  |
| 50 | 1 | 0.02  | 0.03  | 0.00  | 0.21  | 0.22  | -0.15 | -0.13 | -0.14 | 0.09  |
| 51 | 1 | 0.05  | -0.10 | -0.44 | -0.06 | 0.09  | 0.44  | 0.04  | -0.06 | -0.30 |

133

134

135

A

A

A

|                |           |           |           |
|----------------|-----------|-----------|-----------|
| Frequencies -- | 3641.9086 | 3661.7306 | 3674.0324 |
| Red. masses -- | 1.0618    | 1.0459    | 1.0727    |
| Frc consts --  | 8.2973    | 8.2622    | 8.5314    |
| IR Inten --    | 233.2527  | 106.7981  | 174.5080  |
| Raman Activ -- | 135.2718  | 22.9626   | 103.9005  |
| Depolar (P) -- | 0.1960    | 0.2769    | 0.4752    |
| Depolar (U) -- | 0.3278    | 0.4337    | 0.6443    |

| Atom | AN | X     | Y     | Z     | X     | Y     | Z     | X     | Y     | Z     |
|------|----|-------|-------|-------|-------|-------|-------|-------|-------|-------|
| 1    | 8  | 0.00  | 0.00  | 0.00  | 0.00  | 0.00  | -0.01 | 0.00  | 0.00  | 0.00  |
| 2    | 1  | 0.02  | 0.02  | -0.02 | -0.10 | -0.07 | 0.06  | -0.01 | -0.01 | 0.01  |
| 3    | 1  | -0.02 | -0.01 | -0.02 | 0.05  | 0.02  | 0.04  | 0.00  | 0.00  | 0.00  |
| 4    | 8  | 0.00  | 0.00  | 0.00  | -0.01 | 0.00  | 0.00  | 0.00  | 0.01  | 0.01  |
| 5    | 1  | -0.01 | -0.03 | -0.03 | 0.05  | 0.10  | 0.10  | -0.05 | -0.07 | -0.09 |
| 6    | 1  | -0.02 | 0.03  | 0.01  | 0.11  | -0.13 | -0.03 | 0.01  | -0.01 | 0.00  |
| 7    | 8  | 0.00  | 0.00  | 0.00  | 0.00  | 0.01  | 0.00  | 0.00  | 0.00  | 0.00  |
| 8    | 1  | 0.03  | 0.00  | -0.01 | -0.07 | 0.01  | 0.03  | -0.01 | 0.00  | 0.00  |
| 9    | 1  | -0.02 | 0.05  | 0.00  | 0.04  | -0.12 | -0.01 | 0.00  | 0.00  | 0.00  |
| 10   | 8  | 0.00  | 0.00  | 0.00  | 0.00  | 0.00  | 0.00  | 0.02  | 0.01  | -0.02 |
| 11   | 1  | 0.01  | 0.00  | -0.02 | 0.01  | 0.00  | -0.01 | -0.30 | -0.10 | 0.36  |
| 12   | 1  | 0.00  | 0.00  | 0.00  | -0.01 | 0.01  | -0.01 | 0.03  | -0.02 | 0.02  |
| 13   | 8  | 0.00  | 0.00  | 0.00  | 0.00  | 0.00  | 0.00  | 0.00  | -0.02 | 0.02  |
| 14   | 1  | -0.01 | 0.00  | 0.01  | 0.00  | 0.00  | 0.00  | 0.03  | -0.03 | -0.05 |
| 15   | 1  | 0.00  | -0.03 | 0.02  | 0.00  | -0.04 | 0.03  | 0.03  | 0.36  | -0.28 |
| 16   | 8  | 0.00  | 0.00  | 0.00  | 0.00  | 0.00  | 0.00  | 0.00  | 0.00  | 0.00  |
| 17   | 1  | -0.01 | -0.01 | 0.00  | 0.00  | 0.00  | 0.00  | 0.00  | -0.01 | 0.00  |
| 18   | 1  | 0.05  | -0.01 | -0.01 | 0.01  | 0.00  | 0.00  | -0.05 | 0.01  | 0.01  |
| 19   | 8  | 0.00  | 0.00  | 0.00  | 0.00  | 0.00  | 0.00  | 0.00  | 0.00  | 0.00  |
| 20   | 1  | 0.00  | 0.00  | 0.00  | 0.00  | 0.00  | 0.00  | 0.02  | 0.00  | 0.00  |
| 21   | 1  | 0.00  | 0.00  | 0.00  | 0.00  | 0.00  | 0.00  | 0.00  | 0.00  | 0.00  |
| 22   | 8  | 0.00  | 0.00  | 0.00  | 0.00  | 0.00  | 0.00  | 0.00  | 0.00  | 0.00  |
| 23   | 1  | -0.01 | -0.03 | -0.02 | 0.00  | 0.00  | 0.00  | 0.00  | 0.00  | 0.00  |
| 24   | 1  | 0.01  | 0.00  | 0.00  | 0.00  | 0.00  | 0.00  | 0.00  | 0.00  | 0.00  |
| 25   | 8  | 0.00  | 0.00  | 0.00  | 0.00  | 0.00  | 0.00  | 0.00  | 0.00  | 0.00  |
| 26   | 1  | -0.04 | 0.05  | 0.06  | 0.03  | -0.04 | -0.06 | -0.01 | 0.01  | 0.02  |
| 27   | 1  | 0.00  | 0.02  | -0.01 | -0.01 | 0.02  | -0.01 | 0.00  | 0.01  | 0.00  |
| 28   | 8  | -0.02 | -0.03 | 0.03  | 0.00  | 0.00  | 0.00  | 0.00  | -0.01 | 0.01  |

|                |   |           |       |       |           |       |       |           |       |       |
|----------------|---|-----------|-------|-------|-----------|-------|-------|-----------|-------|-------|
| 29             | 1 | 0.39      | 0.52  | -0.46 | 0.04      | 0.05  | -0.04 | 0.07      | 0.09  | -0.08 |
| 30             | 1 | -0.07     | 0.01  | -0.07 | -0.01     | 0.00  | -0.01 | -0.01     | 0.00  | -0.01 |
| 31             | 8 | 0.00      | 0.00  | 0.00  | 0.00      | 0.00  | 0.00  | 0.00      | 0.00  | 0.00  |
| 32             | 1 | -0.02     | 0.01  | 0.02  | -0.01     | 0.00  | 0.01  | -0.01     | 0.00  | 0.01  |
| 33             | 1 | 0.01      | -0.01 | 0.00  | -0.02     | 0.02  | -0.01 | -0.01     | 0.01  | -0.01 |
| 34             | 8 | 0.02      | 0.02  | 0.00  | 0.00      | 0.00  | 0.00  | 0.00      | -0.01 | 0.02  |
| 35             | 1 | -0.18     | 0.05  | -0.29 | -0.01     | 0.01  | -0.03 | -0.12     | 0.02  | -0.17 |
| 36             | 1 | -0.19     | -0.30 | 0.26  | -0.05     | -0.08 | 0.07  | 0.14      | 0.21  | -0.18 |
| 37             | 8 | 0.00      | 0.00  | 0.00  | 0.00      | 0.00  | 0.00  | 0.00      | 0.00  | 0.00  |
| 38             | 1 | 0.00      | 0.00  | 0.00  | 0.00      | 0.00  | -0.01 | 0.00      | 0.01  | 0.03  |
| 39             | 1 | 0.00      | 0.00  | 0.00  | 0.00      | 0.00  | 0.00  | 0.00      | 0.00  | 0.00  |
| 40             | 8 | 0.00      | 0.00  | 0.00  | 0.00      | 0.00  | 0.00  | 0.00      | 0.00  | 0.00  |
| 41             | 1 | 0.00      | 0.00  | 0.00  | 0.00      | 0.00  | 0.01  | 0.00      | 0.00  | 0.00  |
| 42             | 1 | 0.00      | 0.00  | 0.00  | 0.00      | 0.00  | 0.00  | 0.00      | 0.00  | 0.00  |
| 43             | 8 | 0.00      | 0.00  | 0.00  | 0.03      | -0.04 | 0.01  | 0.00      | 0.00  | 0.00  |
| 44             | 1 | -0.03     | -0.06 | 0.00  | 0.27      | 0.53  | 0.02  | 0.03      | 0.06  | 0.00  |
| 45             | 1 | 0.07      | -0.01 | 0.02  | -0.70     | 0.07  | -0.16 | -0.06     | 0.01  | -0.01 |
| 46             | 8 | 0.00      | 0.00  | 0.00  | 0.00      | 0.00  | 0.00  | 0.00      | 0.04  | 0.00  |
| 47             | 1 | 0.01      | 0.01  | -0.01 | -0.02     | -0.01 | 0.01  | -0.11     | -0.07 | 0.06  |
| 48             | 1 | -0.01     | 0.03  | 0.00  | -0.01     | 0.03  | 0.00  | 0.15      | -0.48 | -0.01 |
| 49             | 8 | 0.00      | 0.00  | 0.00  | 0.00      | 0.00  | 0.00  | 0.01      | 0.01  | -0.01 |
| 50             | 1 | 0.00      | 0.00  | 0.00  | 0.01      | 0.01  | -0.01 | -0.18     | -0.20 | 0.12  |
| 51             | 1 | 0.00      | 0.00  | 0.00  | 0.00      | 0.00  | 0.01  | 0.00      | 0.01  | 0.01  |
|                |   | 136       |       |       | 137       |       |       | 138       |       |       |
|                |   | A         |       |       | A         |       |       | A         |       |       |
| Frequencies -- |   | 3688.3594 |       |       | 3695.4122 |       |       | 3698.6733 |       |       |
| Red. masses -- |   | 1.0760    |       |       | 1.0840    |       |       | 1.0799    |       |       |
| Frc consts --  |   | 8.6241    |       |       | 8.7218    |       |       | 8.7041    |       |       |
| IR Inten --    |   | 530.9313  |       |       | 1075.2676 |       |       | 2536.4686 |       |       |



Raman Activ -- 53.6522 35.0515 18.7465

Depolar (P) -- 0.6115 0.5828 0.5516

Depolar (U) -- 0.7590 0.7365 0.7110

| Atom | AN | X     | Y     | Z     | X     | Y     | Z     | X     | Y     | Z     |
|------|----|-------|-------|-------|-------|-------|-------|-------|-------|-------|
| 1    | 8  | 0.00  | 0.00  | 0.00  | 0.00  | 0.00  | 0.00  | 0.00  | 0.00  | 0.00  |
| 2    | 1  | -0.01 | 0.00  | 0.00  | 0.01  | 0.01  | 0.00  | 0.01  | 0.01  | -0.01 |
| 3    | 1  | 0.00  | 0.00  | 0.00  | -0.01 | 0.00  | 0.00  | -0.01 | -0.01 | -0.01 |
| 4    | 8  | 0.01  | -0.02 | -0.01 | 0.00  | 0.00  | 0.00  | 0.00  | 0.00  | 0.00  |
| 5    | 1  | 0.10  | 0.15  | 0.17  | -0.01 | -0.01 | -0.01 | -0.03 | -0.05 | -0.05 |
| 6    | 1  | -0.18 | 0.21  | 0.04  | -0.02 | 0.03  | 0.01  | -0.01 | 0.02  | 0.00  |
| 7    | 8  | 0.00  | 0.00  | 0.00  | 0.02  | -0.02 | -0.01 | 0.00  | 0.01  | 0.00  |
| 8    | 1  | -0.01 | 0.00  | 0.00  | -0.21 | 0.00  | 0.08  | 0.04  | 0.00  | -0.01 |
| 9    | 1  | 0.00  | -0.01 | 0.00  | -0.08 | 0.27  | 0.02  | 0.03  | -0.10 | -0.01 |
| 10   | 8  | 0.00  | 0.00  | 0.00  | 0.00  | 0.00  | 0.00  | 0.00  | 0.01  | -0.01 |
| 11   | 1  | -0.06 | -0.02 | 0.07  | 0.04  | 0.01  | -0.05 | -0.08 | -0.02 | 0.09  |
| 12   | 1  | 0.00  | 0.00  | 0.00  | 0.01  | -0.02 | 0.02  | 0.06  | -0.07 | 0.08  |
| 13   | 8  | 0.00  | 0.00  | 0.00  | 0.00  | 0.01  | -0.01 | 0.01  | 0.02  | -0.02 |
| 14   | 1  | 0.00  | 0.00  | 0.00  | -0.02 | 0.01  | 0.03  | -0.06 | 0.05  | 0.10  |
| 15   | 1  | 0.01  | 0.07  | -0.05 | -0.01 | -0.10 | 0.08  | -0.03 | -0.31 | 0.24  |
| 16   | 8  | 0.00  | 0.00  | 0.00  | 0.00  | 0.00  | 0.00  | 0.00  | 0.00  | 0.00  |
| 17   | 1  | 0.01  | 0.02  | 0.01  | 0.00  | 0.00  | 0.00  | -0.01 | -0.01 | 0.00  |
| 18   | 1  | 0.04  | -0.01 | -0.01 | -0.01 | 0.00  | 0.00  | -0.01 | 0.00  | 0.01  |
| 19   | 8  | 0.00  | 0.00  | 0.00  | 0.00  | 0.00  | 0.00  | 0.00  | 0.00  | 0.00  |
| 20   | 1  | 0.02  | 0.00  | 0.01  | 0.07  | 0.01  | 0.02  | 0.00  | 0.00  | 0.00  |
| 21   | 1  | 0.00  | 0.00  | 0.00  | 0.00  | 0.02  | 0.01  | 0.00  | -0.01 | 0.00  |
| 22   | 8  | 0.00  | 0.00  | 0.00  | 0.00  | 0.00  | 0.00  | 0.00  | 0.00  | 0.00  |
| 23   | 1  | 0.00  | 0.00  | 0.00  | -0.01 | -0.04 | -0.02 | 0.00  | 0.01  | 0.01  |
| 24   | 1  | 0.00  | 0.00  | 0.00  | -0.02 | 0.00  | 0.00  | 0.01  | 0.00  | 0.00  |
| 25   | 8  | 0.00  | 0.00  | 0.00  | 0.00  | 0.00  | 0.00  | 0.00  | 0.00  | 0.00  |

|    |   |       |       |       |       |       |       |       |       |       |
|----|---|-------|-------|-------|-------|-------|-------|-------|-------|-------|
| 26 | 1 | 0.00  | 0.00  | 0.00  | 0.00  | 0.00  | 0.00  | 0.01  | -0.02 | -0.02 |
| 27 | 1 | 0.00  | 0.00  | 0.00  | 0.00  | 0.00  | 0.00  | 0.00  | -0.01 | 0.01  |
| 28 | 8 | 0.00  | 0.00  | 0.00  | 0.00  | 0.00  | 0.00  | 0.00  | 0.01  | -0.01 |
| 29 | 1 | 0.01  | 0.01  | -0.01 | -0.03 | -0.04 | 0.04  | -0.09 | -0.11 | 0.10  |
| 30 | 1 | 0.00  | 0.00  | 0.01  | -0.01 | 0.00  | -0.01 | 0.05  | -0.02 | 0.06  |
| 31 | 8 | 0.00  | 0.00  | 0.00  | 0.05  | -0.04 | -0.02 | -0.01 | 0.01  | 0.00  |
| 32 | 1 | 0.00  | 0.00  | 0.00  | -0.44 | 0.23  | 0.52  | 0.09  | -0.05 | -0.11 |
| 33 | 1 | 0.00  | 0.00  | 0.00  | -0.31 | 0.34  | -0.21 | 0.10  | -0.11 | 0.07  |
| 34 | 8 | 0.00  | 0.00  | 0.00  | 0.00  | 0.00  | 0.00  | 0.01  | 0.02  | -0.03 |
| 35 | 1 | 0.00  | 0.00  | 0.00  | 0.01  | 0.00  | 0.02  | 0.12  | -0.02 | 0.17  |
| 36 | 1 | 0.03  | 0.05  | -0.04 | -0.03 | -0.04 | 0.04  | -0.23 | -0.34 | 0.29  |
| 37 | 8 | 0.00  | 0.00  | 0.00  | 0.00  | 0.00  | 0.00  | 0.00  | 0.00  | 0.00  |
| 38 | 1 | 0.00  | 0.01  | 0.05  | 0.00  | 0.00  | 0.02  | 0.00  | 0.01  | 0.03  |
| 39 | 1 | -0.03 | 0.01  | 0.01  | 0.00  | 0.00  | 0.00  | -0.01 | 0.00  | 0.00  |
| 40 | 8 | 0.00  | 0.00  | 0.00  | 0.00  | 0.00  | 0.00  | 0.00  | 0.00  | 0.00  |
| 41 | 1 | 0.00  | 0.00  | 0.00  | 0.00  | 0.00  | 0.00  | 0.02  | 0.01  | 0.04  |
| 42 | 1 | 0.00  | 0.00  | 0.00  | 0.00  | 0.00  | 0.00  | 0.00  | -0.01 | 0.01  |
| 43 | 8 | 0.00  | 0.00  | 0.00  | 0.00  | 0.00  | 0.00  | -0.01 | 0.00  | 0.00  |
| 44 | 1 | 0.01  | 0.02  | 0.00  | 0.02  | 0.05  | 0.00  | 0.01  | 0.02  | 0.00  |
| 45 | 1 | -0.02 | 0.00  | 0.00  | 0.04  | -0.01 | 0.01  | 0.07  | -0.01 | 0.02  |
| 46 | 8 | 0.00  | -0.04 | 0.00  | 0.00  | 0.01  | 0.00  | 0.00  | 0.03  | -0.01 |
| 47 | 1 | 0.12  | 0.08  | -0.06 | -0.07 | -0.05 | 0.04  | -0.19 | -0.14 | 0.10  |
| 48 | 1 | -0.15 | 0.49  | 0.01  | 0.03  | -0.10 | 0.00  | 0.11  | -0.36 | -0.01 |
| 49 | 8 | 0.03  | 0.03  | -0.03 | 0.00  | 0.00  | -0.01 | 0.02  | 0.01  | -0.02 |
| 50 | 1 | -0.45 | -0.49 | 0.28  | -0.05 | -0.06 | 0.03  | -0.24 | -0.26 | 0.15  |
| 51 | 1 | -0.01 | 0.05  | 0.15  | -0.01 | 0.03  | 0.12  | -0.02 | 0.05  | 0.19  |

139

140

141

A

A

A

Frequencies -- 3715.4777

3730.7332

3732.9246

|                |          |          |         |
|----------------|----------|----------|---------|
| Red. masses -- | 1.0721   | 1.0810   | 1.0699  |
| Frc consts --  | 8.7197   | 8.8643   | 8.7842  |
| IR Inten --    | 191.6324 | 810.9642 | 46.1910 |
| Raman Activ -- | 34.7714  | 46.9813  | 64.6957 |
| Depolar (P) -- | 0.3000   | 0.5724   | 0.1142  |
| Depolar (U) -- | 0.4615   | 0.7281   | 0.2050  |

| Atom | AN | X     | Y     | Z     | X     | Y     | Z     | X     | Y     | Z     |
|------|----|-------|-------|-------|-------|-------|-------|-------|-------|-------|
| 1    | 8  | 0.00  | 0.00  | 0.00  | -0.01 | -0.01 | 0.00  | 0.00  | 0.00  | 0.00  |
| 2    | 1  | 0.01  | 0.01  | -0.01 | 0.08  | 0.06  | -0.05 | -0.05 | -0.04 | 0.03  |
| 3    | 1  | -0.01 | 0.00  | -0.01 | 0.09  | 0.04  | 0.09  | 0.00  | 0.00  | 0.00  |
| 4    | 8  | 0.00  | 0.00  | 0.00  | 0.01  | 0.00  | 0.00  | 0.00  | 0.00  | 0.00  |
| 5    | 1  | 0.01  | 0.02  | 0.02  | -0.03 | -0.06 | -0.07 | 0.00  | 0.01  | 0.01  |
| 6    | 1  | 0.01  | -0.01 | 0.00  | -0.07 | 0.09  | 0.02  | 0.01  | -0.02 | 0.00  |
| 7    | 8  | 0.00  | 0.00  | 0.00  | 0.00  | 0.01  | 0.00  | 0.00  | 0.00  | 0.00  |
| 8    | 1  | -0.03 | 0.00  | 0.01  | -0.08 | 0.01  | 0.03  | 0.03  | 0.00  | -0.01 |
| 9    | 1  | -0.01 | 0.04  | 0.00  | 0.05  | -0.13 | -0.01 | -0.01 | 0.03  | 0.00  |
| 10   | 8  | 0.02  | 0.01  | -0.03 | -0.01 | 0.00  | 0.01  | -0.02 | -0.01 | 0.03  |
| 11   | 1  | -0.38 | -0.13 | 0.45  | 0.11  | 0.04  | -0.12 | 0.34  | 0.12  | -0.40 |
| 12   | 1  | 0.01  | 0.01  | -0.02 | -0.01 | 0.01  | -0.01 | -0.03 | 0.02  | -0.01 |
| 13   | 8  | 0.00  | -0.02 | 0.01  | 0.00  | -0.01 | 0.01  | 0.00  | -0.03 | 0.03  |
| 14   | 1  | -0.04 | 0.02  | 0.07  | 0.01  | -0.01 | -0.01 | 0.02  | -0.03 | -0.02 |
| 15   | 1  | 0.02  | 0.25  | -0.20 | 0.01  | 0.16  | -0.12 | 0.05  | 0.51  | -0.41 |
| 16   | 8  | 0.00  | 0.00  | 0.00  | 0.00  | 0.00  | 0.00  | 0.00  | 0.00  | 0.00  |
| 17   | 1  | 0.00  | 0.00  | 0.00  | 0.00  | 0.00  | 0.00  | 0.00  | 0.00  | 0.00  |
| 18   | 1  | 0.03  | -0.01 | -0.01 | 0.00  | 0.00  | 0.00  | 0.00  | 0.00  | 0.00  |
| 19   | 8  | 0.00  | 0.00  | 0.00  | 0.00  | 0.00  | 0.00  | 0.00  | 0.00  | 0.00  |
| 20   | 1  | 0.00  | 0.00  | 0.00  | 0.00  | 0.00  | 0.00  | 0.00  | 0.00  | 0.00  |
| 21   | 1  | 0.00  | 0.01  | 0.00  | 0.00  | 0.00  | 0.00  | 0.00  | 0.00  | 0.00  |
| 22   | 8  | 0.00  | 0.00  | 0.00  | 0.00  | 0.00  | 0.00  | 0.00  | 0.00  | 0.00  |

|    |   |       |       |       |       |       |       |       |       |       |
|----|---|-------|-------|-------|-------|-------|-------|-------|-------|-------|
| 23 | 1 | 0.00  | 0.00  | 0.00  | 0.00  | 0.01  | 0.00  | 0.00  | 0.00  | 0.00  |
| 24 | 1 | 0.00  | 0.00  | 0.00  | 0.00  | 0.00  | 0.00  | 0.00  | 0.00  | 0.00  |
| 25 | 8 | 0.00  | 0.00  | 0.00  | 0.00  | 0.00  | 0.00  | 0.00  | 0.00  | 0.00  |
| 26 | 1 | 0.01  | -0.01 | -0.02 | 0.01  | 0.00  | -0.01 | 0.01  | -0.01 | -0.01 |
| 27 | 1 | 0.00  | -0.01 | 0.01  | 0.00  | 0.00  | 0.00  | 0.00  | -0.01 | 0.00  |
| 28 | 8 | 0.00  | 0.01  | -0.01 | 0.00  | 0.00  | 0.00  | 0.00  | 0.01  | -0.01 |
| 29 | 1 | -0.08 | -0.10 | 0.09  | 0.00  | 0.00  | 0.00  | -0.05 | -0.06 | 0.05  |
| 30 | 1 | 0.09  | -0.03 | 0.10  | 0.02  | -0.01 | 0.03  | 0.07  | -0.03 | 0.09  |
| 31 | 8 | 0.01  | 0.00  | 0.00  | 0.00  | 0.00  | 0.00  | 0.00  | 0.00  | 0.00  |
| 32 | 1 | -0.06 | 0.03  | 0.07  | 0.02  | -0.01 | -0.02 | 0.01  | 0.00  | -0.01 |
| 33 | 1 | -0.04 | 0.04  | -0.03 | 0.01  | -0.01 | 0.01  | 0.00  | 0.00  | 0.00  |
| 34 | 8 | 0.01  | 0.02  | -0.03 | 0.00  | 0.00  | 0.00  | 0.01  | 0.02  | -0.02 |
| 35 | 1 | 0.12  | -0.02 | 0.16  | 0.01  | 0.00  | 0.02  | 0.07  | -0.01 | 0.09  |
| 36 | 1 | -0.22 | -0.34 | 0.28  | -0.02 | -0.03 | 0.02  | -0.15 | -0.23 | 0.19  |
| 37 | 8 | 0.00  | 0.00  | 0.00  | 0.00  | 0.00  | 0.00  | 0.00  | 0.00  | 0.00  |
| 38 | 1 | 0.00  | 0.00  | -0.02 | 0.00  | 0.00  | 0.00  | 0.00  | 0.00  | 0.01  |
| 39 | 1 | 0.00  | 0.00  | 0.00  | 0.00  | 0.00  | 0.00  | 0.00  | 0.00  | 0.00  |
| 40 | 8 | 0.00  | 0.00  | 0.00  | 0.00  | 0.00  | 0.00  | 0.00  | 0.00  | 0.00  |
| 41 | 1 | 0.01  | 0.01  | 0.02  | -0.01 | 0.00  | -0.01 | -0.03 | -0.02 | -0.06 |
| 42 | 1 | 0.00  | 0.00  | 0.01  | 0.00  | 0.01  | -0.01 | 0.01  | 0.01  | -0.02 |
| 43 | 8 | 0.00  | 0.00  | 0.00  | -0.05 | -0.04 | -0.01 | 0.01  | 0.01  | 0.00  |
| 44 | 1 | 0.00  | 0.00  | 0.00  | 0.30  | 0.66  | 0.02  | -0.08 | -0.17 | 0.00  |
| 45 | 1 | 0.03  | 0.00  | 0.01  | 0.55  | -0.08 | 0.13  | -0.14 | 0.02  | -0.03 |
| 46 | 8 | -0.01 | -0.02 | 0.01  | 0.00  | 0.00  | 0.00  | 0.00  | 0.01  | 0.00  |
| 47 | 1 | 0.16  | 0.12  | -0.09 | 0.00  | 0.00  | 0.00  | -0.10 | -0.07 | 0.05  |
| 48 | 1 | -0.06 | 0.19  | 0.01  | 0.00  | 0.01  | 0.00  | 0.03  | -0.10 | 0.00  |
| 49 | 8 | -0.01 | -0.01 | 0.02  | 0.00  | 0.00  | 0.00  | 0.00  | 0.00  | -0.01 |
| 50 | 1 | 0.13  | 0.15  | -0.08 | 0.02  | 0.02  | -0.01 | -0.06 | -0.07 | 0.04  |
| 51 | 1 | 0.02  | -0.05 | -0.19 | 0.00  | 0.00  | 0.01  | -0.01 | 0.03  | 0.11  |

|                | 142       |       |       | 143       |       |       | 144       |       |       |       |
|----------------|-----------|-------|-------|-----------|-------|-------|-----------|-------|-------|-------|
|                | A         |       |       | A         |       |       | A         |       |       |       |
| Frequencies -- | 3939.6204 |       |       | 3943.8264 |       |       | 3944.2337 |       |       |       |
| Red. masses -- | 1.0660    |       |       | 1.0659    |       |       | 1.0661    |       |       |       |
| Frc consts --  | 9.7477    |       |       | 9.7684    |       |       | 9.7722    |       |       |       |
| IR Inten --    | 76.4881   |       |       | 69.6208   |       |       | 74.8572   |       |       |       |
| Raman Activ -- | 78.8028   |       |       | 60.9509   |       |       | 104.3086  |       |       |       |
| Depolar (P) -- | 0.2409    |       |       | 0.4999    |       |       | 0.1266    |       |       |       |
| Depolar (U) -- | 0.3883    |       |       | 0.6666    |       |       | 0.2247    |       |       |       |
| Atom           | AN        | X     | Y     | Z         | X     | Y     | Z         | X     | Y     | Z     |
| 1              | 8         | 0.00  | 0.00  | 0.00      | 0.00  | 0.00  | 0.00      | 0.00  | 0.00  | 0.00  |
| 2              | 1         | 0.00  | 0.00  | 0.00      | 0.00  | 0.00  | 0.00      | 0.00  | 0.00  | 0.00  |
| 3              | 1         | 0.00  | 0.00  | 0.00      | 0.00  | 0.00  | 0.00      | 0.00  | 0.00  | 0.00  |
| 4              | 8         | 0.00  | 0.00  | 0.00      | 0.00  | 0.00  | 0.00      | 0.00  | 0.00  | 0.00  |
| 5              | 1         | 0.00  | 0.00  | 0.00      | 0.00  | 0.00  | 0.00      | 0.00  | 0.00  | 0.00  |
| 6              | 1         | 0.00  | 0.00  | 0.00      | -0.01 | 0.01  | 0.00      | -0.02 | 0.02  | 0.00  |
| 7              | 8         | 0.00  | 0.00  | 0.00      | 0.00  | 0.00  | 0.00      | 0.00  | 0.00  | 0.00  |
| 8              | 1         | 0.00  | 0.00  | 0.00      | 0.00  | 0.00  | 0.00      | 0.00  | 0.00  | 0.00  |
| 9              | 1         | 0.00  | 0.00  | 0.00      | 0.01  | -0.02 | 0.00      | 0.00  | 0.01  | 0.00  |
| 10             | 8         | 0.00  | 0.00  | 0.00      | 0.00  | 0.00  | 0.00      | 0.00  | 0.00  | 0.00  |
| 11             | 1         | 0.00  | 0.00  | 0.00      | 0.00  | 0.00  | 0.00      | 0.00  | 0.00  | 0.00  |
| 12             | 1         | 0.00  | 0.00  | 0.00      | 0.00  | 0.00  | 0.00      | 0.00  | 0.00  | 0.00  |
| 13             | 8         | 0.00  | 0.00  | 0.00      | 0.00  | 0.00  | 0.00      | 0.00  | 0.00  | 0.00  |
| 14             | 1         | 0.00  | 0.00  | 0.00      | 0.00  | 0.00  | 0.00      | 0.00  | 0.00  | 0.00  |
| 15             | 1         | 0.00  | 0.00  | 0.00      | 0.00  | 0.00  | 0.00      | 0.00  | 0.00  | 0.00  |
| 16             | 8         | 0.00  | 0.00  | 0.00      | 0.00  | 0.00  | 0.00      | 0.00  | 0.00  | 0.00  |
| 17             | 1         | -0.02 | -0.02 | -0.01     | -0.01 | -0.01 | 0.00      | -0.07 | -0.08 | -0.02 |
| 18             | 1         | 0.00  | 0.00  | 0.00      | 0.00  | 0.00  | 0.00      | 0.00  | 0.00  | 0.00  |
| 19             | 8         | 0.00  | 0.00  | 0.00      | -0.01 | -0.05 | -0.03     | 0.01  | 0.02  | 0.01  |

|    |   |       |       |       |       |       |       |       |       |       |
|----|---|-------|-------|-------|-------|-------|-------|-------|-------|-------|
| 20 | 1 | 0.00  | 0.00  | 0.00  | 0.04  | -0.02 | 0.00  | -0.02 | 0.01  | 0.00  |
| 21 | 1 | 0.00  | 0.01  | 0.01  | 0.15  | 0.80  | 0.42  | -0.06 | -0.34 | -0.18 |
| 22 | 8 | 0.00  | 0.00  | 0.00  | 0.00  | 0.00  | 0.00  | 0.00  | 0.00  | 0.00  |
| 23 | 1 | 0.00  | 0.00  | 0.00  | 0.00  | 0.00  | 0.00  | 0.00  | 0.00  | 0.00  |
| 24 | 1 | 0.01  | 0.00  | 0.00  | 0.00  | 0.00  | 0.00  | 0.01  | 0.00  | 0.00  |
| 25 | 8 | 0.02  | -0.06 | 0.02  | 0.00  | 0.00  | 0.00  | 0.00  | 0.00  | 0.00  |
| 26 | 1 | -0.01 | 0.00  | 0.05  | 0.00  | 0.00  | 0.00  | 0.00  | 0.00  | 0.00  |
| 27 | 1 | -0.29 | 0.89  | -0.34 | 0.00  | -0.01 | 0.00  | 0.00  | 0.01  | 0.00  |
| 28 | 8 | 0.00  | 0.00  | 0.00  | 0.00  | 0.00  | 0.00  | 0.00  | 0.00  | 0.00  |
| 29 | 1 | -0.01 | -0.02 | 0.02  | 0.00  | 0.00  | 0.00  | 0.00  | 0.00  | 0.00  |
| 30 | 1 | 0.00  | 0.00  | 0.00  | 0.00  | 0.00  | 0.00  | 0.00  | 0.00  | 0.00  |
| 31 | 8 | 0.00  | 0.00  | 0.00  | 0.00  | 0.00  | 0.00  | 0.00  | 0.00  | 0.00  |
| 32 | 1 | 0.00  | 0.00  | 0.00  | 0.02  | -0.01 | -0.02 | -0.01 | 0.00  | 0.01  |
| 33 | 1 | 0.00  | 0.00  | 0.00  | 0.00  | 0.00  | 0.00  | 0.00  | 0.00  | 0.00  |
| 34 | 8 | 0.00  | 0.00  | 0.00  | 0.00  | 0.00  | 0.00  | 0.00  | 0.00  | 0.00  |
| 35 | 1 | 0.01  | 0.00  | 0.02  | 0.00  | 0.00  | 0.00  | 0.00  | 0.00  | 0.00  |
| 36 | 1 | 0.00  | 0.00  | 0.00  | 0.00  | 0.00  | 0.00  | 0.00  | 0.00  | 0.00  |
| 37 | 8 | 0.00  | 0.00  | 0.00  | -0.02 | 0.01  | 0.01  | -0.05 | 0.01  | 0.02  |
| 38 | 1 | 0.00  | 0.00  | 0.00  | -0.01 | 0.00  | -0.02 | -0.03 | -0.01 | -0.04 |
| 39 | 1 | -0.01 | 0.00  | 0.00  | 0.36  | -0.08 | -0.14 | 0.83  | -0.18 | -0.33 |
| 40 | 8 | 0.00  | 0.00  | 0.00  | 0.00  | 0.00  | 0.00  | 0.00  | 0.00  | 0.00  |
| 41 | 1 | 0.00  | 0.00  | 0.00  | 0.00  | 0.00  | 0.00  | 0.00  | 0.00  | 0.00  |
| 42 | 1 | 0.00  | 0.00  | 0.00  | 0.00  | -0.01 | 0.01  | 0.00  | 0.00  | -0.01 |
| 43 | 8 | 0.00  | 0.00  | 0.00  | 0.00  | 0.00  | 0.00  | 0.00  | 0.00  | 0.00  |
| 44 | 1 | -0.01 | -0.01 | 0.00  | 0.00  | 0.00  | 0.00  | 0.00  | 0.00  | 0.00  |
| 45 | 1 | 0.01  | 0.00  | 0.00  | 0.00  | 0.00  | 0.00  | 0.00  | 0.00  | 0.00  |
| 46 | 8 | 0.00  | 0.00  | 0.00  | 0.00  | 0.00  | 0.00  | 0.00  | 0.00  | 0.00  |
| 47 | 1 | 0.00  | 0.00  | 0.00  | 0.00  | 0.00  | 0.00  | 0.00  | 0.00  | 0.00  |
| 48 | 1 | 0.00  | 0.00  | 0.00  | 0.00  | 0.00  | 0.00  | 0.00  | 0.01  | 0.00  |

|                |    |           |       |       |           |       |       |           |       |       |      |
|----------------|----|-----------|-------|-------|-----------|-------|-------|-----------|-------|-------|------|
| 49             | 8  | 0.00      | 0.00  | 0.00  | 0.00      | 0.00  | 0.00  | 0.00      | 0.00  | 0.00  | 0.00 |
| 50             | 1  | 0.00      | 0.00  | 0.00  | -0.01     | -0.01 | 0.01  | -0.01     | -0.01 | 0.01  |      |
| 51             | 1  | 0.00      | 0.00  | 0.00  | 0.00      | 0.00  | -0.01 | 0.00      | 0.00  | 0.01  |      |
|                |    | 145       |       |       | 146       |       |       | 147       |       |       |      |
|                |    | A         |       |       | A         |       |       | A         |       |       |      |
| Frequencies -- |    | 3945.4227 |       |       | 3949.5186 |       |       | 3952.6847 |       |       |      |
| Red. masses -- |    | 1.0660    |       |       | 1.0660    |       |       | 1.0666    |       |       |      |
| Frc consts --  |    | 9.7763    |       |       | 9.7971    |       |       | 9.8180    |       |       |      |
| IR Inten --    |    | 83.1811   |       |       | 74.1645   |       |       | 70.2452   |       |       |      |
| Raman Activ -- |    | 100.4646  |       |       | 96.9305   |       |       | 104.0086  |       |       |      |
| Depolar (P) -- |    | 0.1712    |       |       | 0.2102    |       |       | 0.1930    |       |       |      |
| Depolar (U) -- |    | 0.2923    |       |       | 0.3474    |       |       | 0.3236    |       |       |      |
| Atom           | AN | X         | Y     | Z     | X         | Y     | Z     | X         | Y     | Z     |      |
| 1              | 8  | 0.00      | 0.00  | 0.00  | 0.00      | 0.00  | 0.00  | 0.00      | 0.00  | 0.00  |      |
| 2              | 1  | 0.00      | 0.00  | 0.00  | 0.00      | 0.00  | 0.00  | 0.00      | 0.00  | 0.00  |      |
| 3              | 1  | 0.00      | 0.00  | 0.00  | 0.00      | 0.00  | 0.00  | 0.00      | 0.00  | 0.00  |      |
| 4              | 8  | 0.00      | 0.00  | 0.00  | 0.00      | 0.00  | 0.00  | 0.00      | 0.00  | 0.00  |      |
| 5              | 1  | -0.01     | -0.02 | -0.02 | 0.00      | 0.00  | 0.00  | 0.00      | 0.00  | 0.00  |      |
| 6              | 1  | 0.00      | 0.00  | 0.00  | 0.00      | 0.00  | 0.00  | 0.00      | 0.00  | 0.00  |      |
| 7              | 8  | 0.00      | 0.00  | 0.00  | 0.00      | 0.00  | 0.00  | 0.00      | 0.00  | 0.00  |      |
| 8              | 1  | 0.00      | 0.00  | 0.00  | -0.02     | 0.00  | 0.01  | 0.00      | 0.00  | 0.00  |      |
| 9              | 1  | 0.00      | 0.00  | 0.00  | 0.00      | 0.00  | 0.00  | 0.00      | 0.00  | 0.00  |      |
| 10             | 8  | 0.00      | 0.00  | 0.00  | 0.00      | 0.00  | 0.00  | 0.00      | 0.00  | 0.00  |      |
| 11             | 1  | 0.00      | 0.00  | 0.00  | 0.00      | 0.00  | 0.00  | 0.02      | 0.01  | -0.02 |      |
| 12             | 1  | 0.00      | 0.00  | 0.00  | 0.00      | 0.00  | 0.00  | 0.00      | 0.00  | 0.00  |      |
| 13             | 8  | 0.00      | 0.00  | 0.00  | 0.00      | 0.00  | 0.00  | 0.00      | 0.00  | 0.00  |      |
| 14             | 1  | 0.00      | 0.00  | 0.00  | 0.00      | 0.00  | 0.00  | 0.00      | 0.00  | 0.00  |      |
| 15             | 1  | 0.00      | 0.00  | 0.00  | 0.00      | 0.00  | 0.00  | 0.00      | 0.02  | -0.01 |      |
| 16             | 8  | -0.04     | -0.04 | -0.01 | 0.00      | 0.00  | 0.00  | 0.00      | 0.00  | 0.00  |      |

|    |   |       |       |       |       |       |       |       |       |       |
|----|---|-------|-------|-------|-------|-------|-------|-------|-------|-------|
| 17 | 1 | 0.63  | 0.73  | 0.22  | -0.02 | -0.02 | -0.01 | 0.00  | 0.01  | 0.00  |
| 18 | 1 | 0.03  | -0.03 | -0.02 | 0.00  | 0.00  | 0.00  | 0.00  | 0.00  | 0.00  |
| 19 | 8 | 0.00  | 0.00  | 0.00  | 0.00  | 0.00  | 0.00  | 0.00  | 0.00  | 0.00  |
| 20 | 1 | 0.00  | 0.00  | 0.00  | 0.00  | 0.00  | 0.00  | 0.00  | 0.00  | 0.00  |
| 21 | 1 | -0.01 | -0.03 | -0.02 | 0.00  | 0.01  | 0.00  | 0.00  | -0.01 | -0.01 |
| 22 | 8 | 0.00  | 0.00  | 0.00  | -0.06 | -0.01 | -0.02 | 0.00  | 0.00  | 0.00  |
| 23 | 1 | 0.00  | 0.00  | 0.00  | -0.02 | 0.04  | 0.01  | 0.00  | 0.00  | 0.00  |
| 24 | 1 | 0.02  | 0.00  | 0.01  | 0.96  | 0.11  | 0.23  | -0.04 | -0.01 | -0.01 |
| 25 | 8 | 0.00  | 0.00  | 0.00  | 0.00  | 0.00  | 0.00  | 0.00  | 0.00  | 0.00  |
| 26 | 1 | 0.00  | 0.00  | 0.00  | 0.00  | 0.00  | 0.00  | 0.00  | 0.00  | 0.00  |
| 27 | 1 | -0.01 | 0.03  | -0.01 | 0.00  | -0.01 | 0.00  | 0.00  | 0.00  | 0.00  |
| 28 | 8 | 0.00  | 0.00  | 0.00  | 0.00  | 0.00  | 0.00  | 0.00  | 0.00  | 0.00  |
| 29 | 1 | 0.00  | 0.00  | 0.00  | 0.00  | -0.01 | 0.01  | 0.00  | 0.00  | 0.00  |
| 30 | 1 | 0.00  | 0.00  | 0.00  | 0.00  | 0.00  | -0.01 | 0.00  | 0.00  | 0.00  |
| 31 | 8 | 0.00  | 0.00  | 0.00  | 0.00  | 0.00  | 0.00  | 0.00  | 0.00  | 0.00  |
| 32 | 1 | 0.00  | 0.00  | 0.00  | 0.00  | 0.00  | 0.00  | 0.01  | 0.00  | -0.01 |
| 33 | 1 | 0.00  | 0.00  | 0.00  | -0.02 | 0.02  | -0.01 | -0.01 | 0.01  | 0.00  |
| 34 | 8 | 0.00  | 0.00  | 0.00  | 0.00  | 0.00  | 0.00  | 0.00  | 0.00  | 0.00  |
| 35 | 1 | 0.00  | 0.00  | -0.01 | 0.00  | 0.00  | 0.00  | 0.00  | 0.00  | 0.00  |
| 36 | 1 | 0.00  | -0.01 | 0.01  | 0.00  | 0.00  | 0.00  | 0.00  | 0.00  | 0.00  |
| 37 | 8 | -0.01 | 0.00  | 0.00  | 0.00  | 0.00  | 0.00  | 0.00  | 0.00  | 0.00  |
| 38 | 1 | 0.00  | 0.00  | -0.01 | 0.00  | 0.00  | 0.00  | 0.00  | 0.00  | 0.00  |
| 39 | 1 | 0.09  | -0.02 | -0.04 | -0.01 | 0.00  | 0.00  | 0.00  | 0.00  | 0.00  |
| 40 | 8 | 0.00  | 0.00  | 0.00  | 0.00  | 0.00  | 0.00  | 0.02  | 0.03  | -0.05 |
| 41 | 1 | 0.00  | 0.00  | 0.00  | 0.00  | 0.00  | 0.00  | 0.04  | 0.03  | 0.03  |
| 42 | 1 | 0.00  | 0.00  | -0.01 | -0.02 | -0.02 | 0.04  | -0.35 | -0.49 | 0.79  |
| 43 | 8 | 0.00  | 0.00  | 0.00  | 0.00  | 0.00  | 0.00  | 0.00  | 0.00  | 0.00  |
| 44 | 1 | 0.00  | 0.00  | 0.00  | 0.00  | 0.00  | 0.00  | 0.00  | 0.00  | 0.00  |
| 45 | 1 | 0.00  | 0.00  | 0.00  | 0.00  | 0.00  | 0.00  | 0.00  | 0.00  | 0.00  |



|    |   |      |       |      |      |      |      |      |      |      |
|----|---|------|-------|------|------|------|------|------|------|------|
| 46 | 8 | 0.00 | 0.00  | 0.00 | 0.00 | 0.00 | 0.00 | 0.00 | 0.00 | 0.00 |
| 47 | 1 | 0.00 | 0.00  | 0.00 | 0.00 | 0.00 | 0.00 | 0.00 | 0.00 | 0.00 |
| 48 | 1 | 0.01 | -0.02 | 0.00 | 0.00 | 0.00 | 0.00 | 0.00 | 0.00 | 0.00 |
| 49 | 8 | 0.00 | 0.00  | 0.00 | 0.00 | 0.00 | 0.00 | 0.00 | 0.00 | 0.00 |
| 50 | 1 | 0.00 | 0.00  | 0.00 | 0.00 | 0.00 | 0.00 | 0.00 | 0.00 | 0.00 |
| 51 | 1 | 0.00 | 0.00  | 0.00 | 0.00 | 0.00 | 0.00 | 0.00 | 0.00 | 0.00 |

**Part 4. Raman spectra for deuterated rest of the water molecules apart and C4CW molecule.**

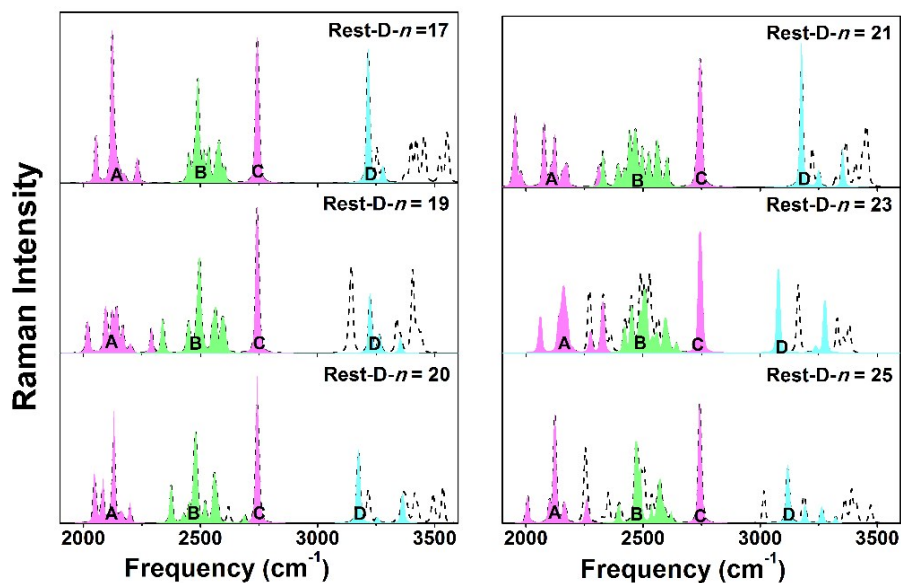

Fig. S1. Raman spectra for O-H bond stretching vibrations in deuterated rest of the water molecules apart. The black dashed lines show features from all bonds in entire clusters. Part A is from those H-bonded ones whose oxygen atoms possess the other H atom dangling outside the cluster. Part B is from those in the undercoordinated water molecules without dangling O-H groups and the sharp Part C corresponds to the dangling ones. Part D is from bonds belonging to the C4CW molecule.

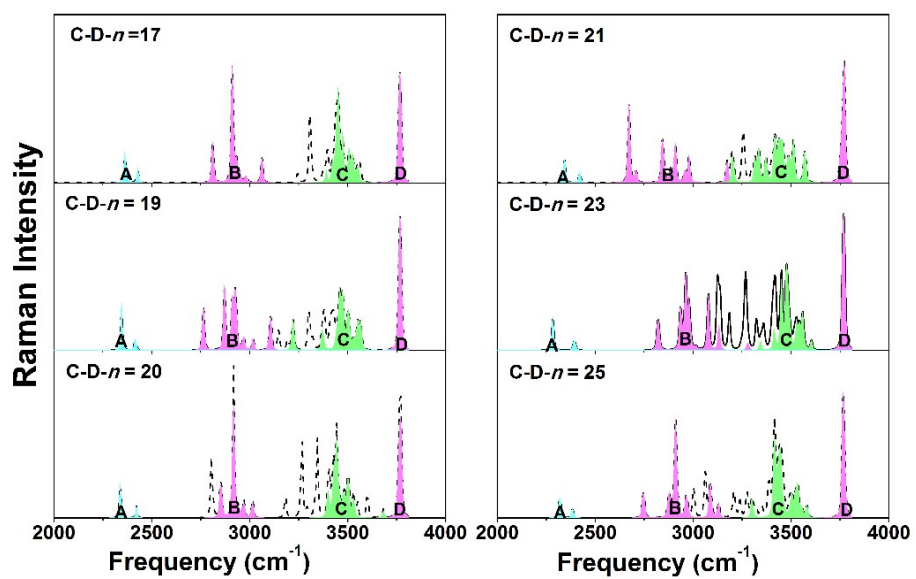

Fig. S2. Raman spectra for O-H bond stretching vibrations in deuterated C4CW molecule. The black dashed lines show features from all bonds in entire clusters. Part A is from bonds belonging to the C4CW molecule. Part B is from those H-bonded ones whose oxygen atoms possess the other H atom dangling outside the cluster. Part C is from those in the undercoordinated water molecules without dangling O-H groups and the sharp Part D corresponds to the dangling ones.
